# Supplementary material for: Analysis of risk factors for poor prognosis in patients with renal insufficiency combined with Enterobacteriaceae bloodstream infection: a retrospective study
Source: PeerJ journal article supplement (doi:10.7717/peerj.19993), 2025-08-29
Supplement: data.xlsx [file data.xlsx]

## Sheet: Sheet1
gender	age		infectious disease	Other diseases	Length of hospitalization	ESBLs	WBC(0 lower,1normalcy,2ascend)	N%(0 lower,1normalcy,2ascend)	L%(0 lower,1normalcy,2ascend)	N(0 lower,1normalcy,2ascend)	L(0 lower,1normalcy,2ascend)	Hb(0 lower,1normalcy,2ascend)	RBC(0 lower,1normalcy,2ascend)	PLT(0 lower,1normalcy,2ascend)	CRP(mg/L)	PCT	PT(0 lower,1normalcy,2ascend)	PT%(0 lower,1normalcy,2ascend)	D-D(0 lower,1normalcy,2ascend)	ALT(0 lower,1normalcy,2ascend)	AST(0 lower,1normalcy,2ascend)	ALB(0 lower,1normalcy,2ascend)	K(0 lower,1normalcy,2ascend)	Na(0 lower,1normalcy,2ascend)	Cl(0 lower,1normalcy,2ascend)	Ca(0 lower,1normalcy,2ascend)	P(0 lower,1normalcy,2ascend)	Mg(0 lower,1normalcy,2ascend)
male	2	Coma、skock、Respiratory failure	pneumonia	heart valve disease、cardiac insufficiency	deaths	1	2	2	0	2	1	0	0	1	8.17		2	0	2	2	2	1	0	1	0	1	1	0
male	3	Coma	pneumonia	pancreatitis、diabetes	23	0	1	2	0	1	1	1	1	1	14.39	2.04	2	0	2	1	1	0	0	1	0	1	1	0
male	13		pneumonia	leukaemia	45	1	0	0	2	0	0	0	0	0		0.25	2	0	2	1	1	1	1	1	1	1	1	1
male	14		pneumonia	leukaemia	Request for discharge	0	0	0	2	0	0	0	0	0						1	1	0	0	1	1	0	1	1
male	16		pneumonia	leukaemia	34	1	0	0	2	0	0	0	0	0	127	6.41				1	1	1	1	1	1	1	2	1
male	17		liver abscess、biliary tract infection		13	0	2	2	0	2	1	1	1	2			2	0	2	2	1	1	1	1	1	1	1	1
male	17			renal insufficiency	14	0	2	1	0	2	1	2	1	0		50				2	2	1	1	0	0	1	2	0
male	17				66	CRE	0	0	2	0	0	0	0	0						1	1	1	1	1	1	1	1	1
female	17		pneumonia、perianal infection	leukaemia	66	0	0	0	2	0	0	0	0	0	166	43.07				1	1	0	0	1	1	1	0	0
female	17		pneumonia	leukaemia	47	1	0	0	2	0	0	0	0	0	174	25.97	2	0	2	1	1	0	1	0	0	0	0	1
male	18		pneumonia	leukaemia	32	1	0	0	2	0	0	0	0	0			2	0	2	1	1	0	0	0	0	0	1	0
male	18		perianal infection	leukaemia	30	1	0	0	2	0	0	0	0	0						2	1	0	1	0	0	0	1	1
male	18		intestinal infection		33	1	2	2	0	2	1	0	0	1	51.9	0.74				1	1	1	1	1	0	1	1	1
female	18		urinary tract infection	diabetes	11	1	2	2	0	2	1	1	1	1			1	1	1	1	1	1	1	0	0	1	2	1
female	19				21	0	0	0	0	0	0	0	0	0	189		1	0	2	2	2	1	0	0	0	1	1	0
female	20		urinary tract infection	leukaemia	28	0	0	0	2	0	0	0	0	0	135	0.74				1	1	1	1	1	1	1	1	1
female	21		urinary tract infection	diabetes	10	1	2	2	0	2	1	1	1	1	281	2.06				2	2	1	1	0	0	1	1	1
female	21	Coma、skock	urinary tract infection、pneumonia	DIC、Gastrointestinal bleeding	deaths	0	0	0	2	0	1	1	1	0			2	0	2	1	2	1	1	1	1	1	0	0
male	22		pneumonia、liver abscess	diabetes	31	0	1	2	0	1	0	0	0	1			1	0	2	1	1	0	1	0	0	0	1	0
male	22		intestinal infection		27	0	1	2	0	2	0	1	1	1	44.5	50				1	2	1	1	1	0	1	2	1
female	23	Respiratory failure	pneumonia、urinary tract infection	renal insufficiency、pregnancies、cardiac insufficiency	20	0	1	2	1	1	1	0	0	1			1	2	2	1	1	0	1	1	1	0	2	1
male	25		pneumonia、biliary tract infection	pancreatitis	17	0	2	1	1	2	1	1	1	1	163	2.29	2	0	2	1	1	1	1	1	1	1	1	1
male	25				17	1	1	2	0	2	0	1	1	1	97.8	0.23				1	1	1	1	1	1	1	1	1
female	26		urinary tract infection	pregnancies	7	1	1	2	0	2	0	0	0	1	123.35					1	1	0	1	1	1	1	1	1
female	27		pneumonia、liver abscess	diabetes	Request for discharge	0	2	2	0	2	0	0	1	0			2	0	2	2	2	0	1	1	1	0	0	1
male	28	skock、Coma、Respiratory failure	pneumonia	cerebral infarction、diabetes、renal insufficiency	Request for discharge	0	1	2	0	1	1	0	0	0			1	0	2	1	1	0	1	0	0	1	1	0
male	28	Coma	pneumonia		Request for discharge	1	2	2	0	2	0	1	1	2			1	1	2	2	1	1	1	1	1	1	2	2
female	28		pneumonia、urinary tract infection	SLE、renal insufficiency、cardiac insufficiency	16	1	2	2	0	2	0	0	0	1	38	50				1	1	0	0	0	0	0	0	0
male	29			leukaemia、bowel obstruction	Request for discharge	0	0	2	0	0	0	0	0	0	116	0.3				1	1	0	1	0	0	0	1	1
male	29		pneumonia	diabetes、renal insufficiency	Request for discharge	1	0	0	2	0	0	0	0	0			2	0	1	1	1	0	1	0	0	1	1	1
male	29			renal insufficiency	Request for discharge	1	2	2	0	2	1	1	1	2	161.77	0.22				2	1	1	1	1	1	1	2	1
female	29		urinary tract infection	heart valve disease、cardiac insufficiency	35	0	1	2	0	1	1	1	1	1	1.33	0.75				2	2	1	1	1	1	1	1	1
female	29	Respiratory failure	pneumonia	diabetes	Request for discharge	1	2	0	2	0	1	1	1	2			1	0	2	1	1	0	1	0	0	1	0	1
male	30		perianal infection	leukaemia	49	CRE	0	0	2	0	0	0	0	0	107	9.44				1	1	1	1	1	1	1	1	0
male	30		pneumonia	leukaemia	Request for discharge	1	0	0	2	0	0	0	0	0	85.6	50				1	1	1	1	1	1	0	1	1
female	30		urinary tract infection	diabetes	6	0	2	2	0	2	1	1	1	1			1	1	2	1	1	0	1	0	0	1	1	0
female	30		urinary tract infection		11	0	2	2	0	2	1	1	1	1	95.2	1.12	1	1	2	1	1	1	0	1	1	1	0	1
female	30		pneumonia	leukaemia	55	1	0	0	2	0	0	0	0	0			2	0	2	1	1	0	1	0	1	0	2	1
female	30		pneumonia	leukaemia	35	1	0	0	2	0	0	0	0	0						2	1	0	1	1	1	1	1	0
female	31	skock、多器官功能衰竭	pneumonia、intestinal infection	renal insufficiency	10	1	2	2	0	2	1	1	1	0		9.82	2	0	2	2	2	1	1	1	1	1	0	1
male	32		liver abscess	cerebral infarction、renal insufficiency	29	0	2	2	0	1	1	1	1	1		50	1	1	2	2	2	1	1	1	1	1	0	1
female	32	0	pneumonia	Gastrointestinal bleeding、renal insufficiency	23	1	1	2	0	1	1	1	1	0	82.93	29.8	2	0	2	2	2	0	1	1	1	0	1	1
female	32			pregnancies	8	1	1	2	0	1	1	1	1	1	52		1	1	2	1	1	1	1	1	1	1	1	1
male	33		pneumonia、liver abscess	diabetes、ARDS	28	0	2	2	0	2	1	0	1	1	258.1		2	0	2	1	1	0	0	1	0	1	1	1
female	33		pneumonia	malignant tumor	12	0	0	2	0	1	0	1	1	1						1	1	0	1	1	0	1	1	1
male	34		liver abscess、urinary tract infection、附睾感染、眼脓肿	diabetes	19	0	2	2	0	2	1	1	1	2	97.99	0.34	1	1	2	1	1	1	1	1	0	1	1	1
female	34	skock	pneumonia、urinary tract infection		15	1	2	2	0	2	0	1	1	1	224.25		1	1	2	1	1	0	1	1	1	1	1	1
female	34		pneumonia	heart valve disease、cardiac insufficiency、renal insufficiency	74	1	0	1	1	1	1	0	0	0			2	0	2	1	1	0	1	0	1	1	1	1
female	34	Coma、skock、Respiratory failure	pneumonia	cardiac insufficiency	deaths	1	2	2	0	2	0	0	0	0			2	0	2	1	1	0	0	2	2	1	0	1
male	35			diabetes	9	0	1	1	1	1	1	1	1	1	35.1	7.26				1	1	1	1	1	0	1	1	1
male	35	skock	pneumonia		deaths	CRE	1	2	0	1	1	0	0	0			2	0	2	1	1	0	1	1	1	0	0	1
male	35	skock	pneumonia		deaths	CRE	1	2	0	1	1	0	0	0			2	0	2	1	1	0	1	1	1	0	0	1
female	35		urinary tract infection	diabetes	27	1	2	2	0	2	1	0	1	1		9.73				1	1	0	1	1	1	1	1	1
male	36	0	pneumonia	bowel obstruction	13	CRE	1	1	2	1	1	1	1	1			1	1	2	2	2	1	0	1	1	1	2	1
female	36			malignant tumor	Request for discharge	0	1	2	0	1	0	0	1	1			1	0	1	1	1	1	1	1	1	1	1	1
female	37			cerebral infarction、hypertension、diabetes、renal insufficiency、renal insufficiency	7	0	1	2	0	1	1	1	1	1		6.45	1	1	2	1	2	0	1	0	0	0	1	1
female	37		pneumonia、perianal infection	renal insufficiency	24	0	0	0	2	0	0	0	0	0	247.14	0.41	2	0	2	1	1	0	1	1	1	1	1	1
male	38		liver abscess	diabetes	16	0	2	2	0	2	1	1	1	2			1	0	2	2	1	0	1	0	0	1	1	0
male	38		liver abscess	diabetes	16	0	2	2	0	2	0	1	1	1	57.37		1	1	2	2	1	1	0	1	1	1	0	1
male	38	Coma、Respiratory failure	pneumonia	leukaemia、renal insufficiency	deaths	0	0	0	2	0	0	0	0	0	19.61					1	1	1	1	1	1	1	1	1
male	38	skock	pneumonia	coronary heart disease、cardiac insufficiency、heart valve disease、renal insufficiency	deaths	1	2	2	0	2	1	1	1	1			2	0	2	1	1	0	1	2	2	0	1	1
male	38	skock	pneumonia	coronary heart disease、cardiac insufficiency、heart valve disease、renal insufficiency	deaths	1	2	2	0	2	1	1	1	1			2	0	2	1	1	0	1	2	2	0	1	1
female	38		urinary tract infection、pneumonia	diabetes	6	0	2	2	0	2	0	0	0	1		9.43				1	1	0	0	0	0	0	0	0
female	38	skock	pneumonia	pancreatitis、renal insufficiency	Request for discharge	1	2	2	0	2	1	0	0	1			2	0	2	1	1	0	1	1	1	0	0	0
male	39	Coma		renal insufficiency	Request for discharge	0	0	2	1	1	1	1	0	0			2	0	2	2	2	0	1	1	1	1	0	1
female	39	Coma	pneumonia	diabetes、renal insufficiency	16	0	2	2	0	2	1	1	1	1			1	1	2	1	1	1	1	0	0	1	0	1
female	39			pregnancies、diabetes	11	1	1	2	2	1	1	0	1	1	42.98	1.77	1	1	2	1	1	0	0	1	1	1	1	1
female	39			malignant tumor	Request for discharge	0	2	2	0	2	0	0	0	0						2	2	0	1	0	1	0	2	1
male	40			leukaemia、diabetes	Request for discharge	0	0	0	2	0	0	0	0	0	69.68	0.4				1	1	0	1	0	0	1	1	1
female	40			cardiac insufficiency	48	1	2	2	0	2	1	0	0	1	252.44	1.49	2	0	2	2	1	0	0	0	0	1	1	2
female	40		urinary tract infection	diabetes	8	1	2	2	0	2	1	0	1	1	109	50				1	1	0	1	0	0	1	1	1
female	40	Respiratory failure	pneumonia、urinary tract infection	diabetes		1	2	2	0	2	1	1	1	0			1	0	2	1	1	0	1	1	0	0	0	1
male	41		liver abscess	renal insufficiency	16	0	2	2	0	2	1	1	1	0	60.4		1	1	2	2	2	1	0	1	0	0	1	2
male	41	skock、Respiratory failure	pneumonia		51	1	2	2	0	2	1	1	1	2			1	1	2	2	2	0	1	1	1	1	1	1
male	41	Coma、skock、Respiratory failure	pneumonia	renal insufficiency、coronary heart disease、diabetes	deaths	0	1	2	0	1	1	0	0	0			1	0	2	2	2	0	1	1	1	1	1	1
male	41	Respiratory failure	pneumonia	cerebral infarction、renal insufficiency	Request for discharge	0	2	2	0	2	0	0	0	1			1	1	2	1	1	0	1	0	0	0	2	1
female	41		urinary tract infection、pneumonia	renal insufficiency	24	0	2	2	0	2	1	0	0	0		19.57	2	0	2	1	1	0	1	0	0	0	1	1
female	41	Coma	pneumonia、urinary tract infection	diabetes、renal insufficiency、pancreatitis	Request for discharge	0	2	2	0	2	0	1	1	1	328.4		1	1	2	1	1	0	1	0	0	1	0	1
female	41		pneumonia、urinary tract infection	diabetes	Request for discharge	0	1	2	0	1	0	0	0	0	180	50	1	1	2	1	1	0	1	1	0	1	1	1
female	41			cerebral infarction	Request for discharge	1	2	2	0	2	1	0	0	2			2	0	2	1	1	0	1	0	1	1	1	1
male	42		pneumonia		36	0	2	2	0	2	1	1	1	1	174.01		1	1	2	2	2	0	1	1	1	1	1	1
male	42	skock、Respiratory failure	pneumonia、liver abscess	renal insufficiency	Request for discharge	0	2	2	0	2	0	0	0	0			2	0	2	2	2	0	1	2	2	0	1	1
male	42			hypertension、diabetes、renal insufficiency	Request for discharge	0	2	2	0	2	0	1	1	1			2	0	2	1	1	0	0	0	0	1	0	1
male	42	skock、Coma	pneumonia	Gastrointestinal bleeding、liver cirrhosis、renal insufficiency	Request for discharge	0	1	2	0	1	1	0	0	0			2	0	2	2	2	0	1	1	1	0	0	1
female	42			leukaemia	26	1	2	0	0	0	0	0	0	0	13.35	0.18	1	1	2	1	1	1	0	1	1	1	1	1
female	42	skock	intestinal infection	bowel obstruction、renal insufficiency	Request for discharge	1	1	2	0	1	0	1	1	1			1	1	2	1	1	0	1	1	1	0	1	2
male	43		pneumonia、biliary tract infection	renal insufficiency	8	0	2	2	0	2	1	1	2	2			1	1	1	2	2	1	0	1	1	1	0	1
male	43		intestinal infection	bowel obstruction	12	1	0	2	0	1	0	1	1	1			2	0	2	1	1	1	0	0	0	1	1	0
male	43	skock、Respiratory failure、Coma	pneumonia、liver abscess	diabetes	deaths	0	2	2	0	2	1	1	1	0			2	0	2	2	2	0	1	0	0	1	1	1
male	43	skock、Coma	pneumonia	diabetes、renal insufficiency	deaths	0	1	2	0	1	1	1	1	2			1	1	2	1	1	0	1	1	1	1	0	2
female	43		urinary tract infection	diabetes	19	1	2	2	0	2	1	1	1	2	71.14	0.23				2	2	1	1	1	0	1	1	1
male	44		pneumonia、liver abscess	diabetes	7	0	1	2	0	1	0	0	0	0	253.1	5.63	1	1	2	2	2	0	1	0	0	1	0	1
male	44		pneumonia、urinary tract infection	cerebral infarction、liver cirrhosis	Request for discharge	0	2	2	0	2	1	1	0	0			2	0	2	1	2	0	1	1	1	0	0	1
male	44	Respiratory failure、skock	pneumonia	cardiac insufficiency、renal insufficiency	Request for discharge	0	1	2	0	1	1	0	0	1		5.49	2	0	2	1	2	1	1	2	2	0	1	1
female	44				9	1	2	2	0	2	1	1	1	1			1	1	1	1	1	0	1	1	1	1	1	1
female	44		pneumonia	leukaemia	Request for discharge	1	0	0	2	0	1	0	0	0			1	1	2	1	1	0	1	2	1	1	1	1
male	45	Coma	pneumonia、liver abscess	diabetes、bowel obstruction、renal insufficiency、hypertension	28	0	2	2	0	2	1	1	1	0			2	0	2	2	2	0	1	0	0	0	0	1
female	45	Coma	pneumonia、urinary tract infection	cardiac insufficiency、renal insufficiency	14	0	1	2	0	2	1	1	1	0			2	0	2	2	2	1	1	1	1	1	2	1
female	45		urinary tract infection	diabetes、hypertension	22	0	2	2	0	2	1	0	1	2			1	1	2	1	1	1	1	1	1	1	1	1
female	45	Respiratory failure	pneumonia	diabetes、cardiac insufficiency	22	0	2	2	0	2	1	1	1	1			2	0	2	1	1	0	1	1	1	1	0	0
female	45		urinary tract infection	diabetes、hypertension	12	1	2	2	0	2	1	0	1	2			1	1	2	1	1	1	1	1	1	1	1	1
female	45				Request for discharge	0	0	0	2	0	0	0	0	0	157	1.36	1	0	2	2	1	0	0	0	0	1	1	1
male	46			malignant tumor	7	1	1	2	0	1	0	0	0	0						2	2	0	0	0	0	0	1	0
male	46			liver cirrhosis	22	1	1	2	0	1	1	0	0	2			2	0	2	1	2	0	1	0	0	1	0	1
male	46	skock	pneumonia	Gastrointestinal bleeding、hypertension、renal insufficiency	13	1	1	2	0	1	1	1	1	0			2	0	2	1	1	0	1	1	1	0	1	1
female	46		pneumonia	hypertension、renal insufficiency	27	0	2	2	0	2	1	0	0	1	20.91		2	0	2	1	1	1	1	2	2	1	2	2
female	46		biliary tract infection、urinary tract infection		7	0	2	2	0	2	1	1	1	1			2	0	1	1	1	1	1	0	0	1	1	1
female	46		urinary tract infection、pneumonia	diabetes	14	1	1	2	0	1	1	1	1	1	46.5	0.42				1	1	0	1	0	0	1	0	1
female	46		pneumonia	pregnancies、hypertension、diabetes	8	1	1	2	0	2	0	0	1	1	130	1.01				1	1	0	0	1	1	1	0	1
female	46		urinary tract infection	hypertension、diabetes、renal insufficiency	16	1	2	2	0	2	1	0	0	2	194	1.92	2	0	2	1	1	0	1	0	0	0	1	1
female	46	skock	perianal infection	leukaemia	deaths	1	0	0	2	0	0	0	0	0						1	1	0	0	0	0	1	0	0
female	46		urinary tract infection	renal insufficiency	Request for discharge	0	2	2	0	2	1	1	1	1	212.54	27.87	2	0	2	1	2	1	0	0	1	1	1	1
female	46	skock、Coma、Respiratory failure	pneumonia、urinary tract infection	renal insufficiency、cerebral infarction	Request for discharge	1	2	2	0	2	0	0	1	0			2	0	2	1	1	0	1	2	1	1	1	0
male	47			leukaemia、diabetes	35	0	0	0	2	0	0	0	0	0	196	0.1				1	1	1	1	1	1	1	1	1
male	47	skock	pneumonia、liver abscess	renal insufficiency、hypertension、diabetes	12	0	1	2	0	1	1	1	1	1	146.72		1	1	2	2	1	1	1	0	0	1	1	1
male	47		liver abscess	diabetes	8	0	2	2	0	2	1	1	1	2	181		2	0	2	1	1	0	1	0	0	1	2	1
male	47		pneumonia	leukaemia	31	1	0	0	2	0	0	0	0	0	14.5	0.34	1	1	1	2	1	1	1	1	1	1	2	1
male	47		urinary tract infection、pneumonia	renal insufficiency、liver cirrhosis	12	1	2	2	1	2	1	0	0	1	73.4		2	0	2	1	2	0	1	0	1	0	1	1
female	47		urinary tract infection	diabetes、renal insufficiency	14	0	1	2	0	1	1	1	1	0	329	16.5	1	1	2	1	1	0	1	0	0	0	0	1
female	47		urinary tract infection		11	0	1	2	0	1	0	0	0	1	189.14		2	0	2	1	1	0	0	0	0	1	0	1
female	47		pneumonia	leukaemia	26	CRE	0	0	2	0	0	0	0	0			2	0	2	1	1	1	1	0	0	0	1	1
male	48		pneumonia	diabetes	20	0	2	2	0	2	1	0	1	1	150	6.47	2	0	2	1	1	0	1	0	0	0	1	1
male	48		liver abscess	diabetes、renal insufficiency	9	0	2	2	0	2	1	1	1	0		50	1	1	2	2	2	0	1	0	0	1	0	1
male	48		urinary tract infection	renal insufficiency	3	0	2	2	0	2	1	1	1	1			1	1	2	1	1	0	1	1	1	0	2	1
male	48			malignant tumor、Gastrointestinal bleeding、bowel obstruction、renal insufficiency	52	1	2	2	0	2	0	0	0	1						1	1	1	2	0	0	0	2	1
male	48	skock	urinary tract infection、pneumonia、liver abscess	renal insufficiency、diabetes	160	1	2	2	0	2	1	0	0	0		2.32	2	0	2	1	1	1	0	2	2	1	1	1
male	48	skock	pneumonia、liver abscess	renal insufficiency、diabetes	190	CRE	2	2	0	2	1	0	0	0		50	2	0	2	1	1	0	0	2	2	0	1	1
male	48	skock	pneumonia	leukaemia、diabetes	deaths	1	0	0	2	0	0	0	0	0			2	0	2	1	1	0	0	0	0	1	1	1
male	48	skock	liver abscess、pneumonia	renal insufficiency、diabetes、coronary heart disease	Request for discharge	0	2	2	0	2	1	0	1	0			2	0	2	2	2	0	1	0	0	1	1	0
female	48	Respiratory failure	pneumonia、urinary tract infection	hypertension、diabetes	17	0	1	2	0	1	0	0	1	0			2	0	2	2		0	1	1	1	0	1	0
female	48		urinary tract infection、pneumonia	diabetes、renal insufficiency	10	0	2	2	0	2	1	1	1	1	255.41	3.02				2	2	0	1	0	0	1	0	1
female	48		urinary tract infection	cerebral infarction、hypertension、renal insufficiency、diabetes	11	0	2	2	0	2	1	1	1	2	13.23	3.65	2	0	2	1	1	0	0	0	0	1	0	1
female	48		pneumonia	leukaemia、DIC、cerebral infarction	41	0	0	0	2	0	0	0	0	0	137	0.09	2	0	2	1	1	1	1	0	0	1	1	1
female	48	0	pneumonia	cardiac insufficiency	38	1	2	2	0	2	0	0	1	1			2	0	2	2	1	1	1	2	1	1	1	1
female	48		pneumonia	renal insufficiency	Request for discharge	0	2	2	0	2	1	1	1	0			2	0	2	2	2	0	0	1	1	1	1	0
female	48		urinary tract infection、pneumonia	diabetes、cardiac insufficiency	Request for discharge	1	1	2	0	1	0	0	1	0	143	18.06	2	0	2	1	1	0	1	1	0	0	0	1
male	49			hypertension	14	0	2	2	0	2	0	1	1	1		3.2	1	1	2	1	1	1	1	1	1	1	1	1
male	49		pneumonia	leukaemia、diabetes	26	1	0	2	2	0	0	0	0	0						1	1	0	1	1	1	0	1	1
male	49		pneumonia		28	1	0	0	2	0	0	0	0	0	27					1	1	0	1	1	1	0	1	1
male	49		pneumonia、biliary tract infection	malignant tumor	10	1	2	2	0	2	1	0	0	1			2	0	2	2	2	0	1	0	1	1	1	1
male	49	Respiratory failure	urinary tract infection、pneumonia	malignant tumor、renal insufficiency	21	1	2	2	0	2	1	0	0	1	111.84		2	0	2	1	1	0	1	0	1	1	2	1
male	49	Coma、skock、Respiratory failure	pneumonia	renal insufficiency、Gastrointestinal bleeding	deaths	CRE	1	2	0	1	1	0	0	0			1	1	2	1	1	0	1	1	0	1	0	1
male	49	skock、Coma	pneumonia、urinary tract infection	renal insufficiency、pancreatitis	deaths	CRE	2	2	0	2	1	0	0	1	144		2	0	2	1	2	1	1	1	0	1	2	1
male	49			malignant tumor	Request for discharge	0	1	2	0	1	1	1	1	1	145	1.14				2	2	1	1	0	0	1	0	1
male	49		pneumonia		Request for discharge	0	2	2	0	2	1	1	1	1	57.99	20.63	1	1	1	2	2	1	1	1	1	1	1	1
female	49	skock、Coma、Respiratory failure	pneumonia、liver abscess	renal insufficiency、diabetes	26	0	2	2	0	2	1	1	1	0			1	0	2	2	2	0	1	0	0	1	0	1
female	49		pneumonia	leukaemia	20	0	0	0	2	0	0	0	0	0						1	1	0	1	0	1	1	1	1
female	49		urinary tract infection		9	0	1	2	0	1	1	0	0	2			2	0	2	1	1	0	0	1	1	1	1	1
female	49			leukaemia、renal insufficiency	28	1	0	0	2	0	0	0	0	0	151.3	0.93				1	1	0	0	1	1	1	1	1
female	49				19	1	1	2	1	1	1	1	1	1	65.23	1.13	1	1	2	1	1	1	1	0	0	1	1	1
female	49		pneumonia	leukaemia、renal insufficiency	Request for discharge	1	0	1	0	0	0	0	0	0	384	16.43	1	1	2	1	1	0	0	0	0	1	1	1
male	50			hypertension	83	0	0	2	2	0	1	1	1	0	55.8	0.35	1	1	1	1	1	1	0	2	1	1	2	1
male	50		liver abscess	coronary heart disease、diabetes、renal insufficiency	12	0	1	2	0	1	0	1	1	1	206.02	5.64	2	0	2	2	2	0	1	0	0	1	1	0
male	50		pneumonia	malignant tumor	19	1	2	2	0	2	0	1	1	2						1	2	1	1	1	1	1	1	1
male	50	skock	urinary tract infection、pneumonia、pneumonia、biliary tract infection	renal insufficiency	17	1	1	2	0	1	0	0	0	0			1	0	2	1	1	1	1	0	0	1	1	2
male	50		biliary tract infection	malignant tumor、liver cirrhosis	25	1	1	2	0	1	0	0	0	1	194.47		2	0	2	2	2	0	1	0	0	1	0	0
male	50		urinary tract infection	cerebral infarction、renal insufficiency	9	1	2	2	0	2	1	1	1	1			2	0	2	1	1	1	1	0	0	1	1	1
male	50		urinary tract infection	renal insufficiency、diabetes	14	1	2	2	0	2	1	1	1	0			1	1	2	1	1	1	1	0	1	1	1	1
male	50			liver cirrhosis、renal insufficiency、malignant tumor	12	CRE	2	2	0	2	1	0	1	1						1	1	0	1	0	0	1	2	1
male	50	Coma	pneumonia		Request for discharge	1	1	2	0	2	0	0	0	1			1	1	2	1	1	1	1	1	1	0	1	1
male	50			leukaemia、diabetes、coronary heart disease、Gastrointestinal bleeding	Request for discharge	1	0	0	2	0	0	0	0	0						1	1	0	1	0	0	1	1	1
female	50	skock	urinary tract infection	renal insufficiency	13	0	2	2	0	2	0	0	1	0	398		2	0	2	1	1	0	0	0	0	0	1	1
female	50			coronary heart disease、diabetes	4	0	2	2	0	2	0	1	1	1	284.8		1	1	2	1	1	1	1	0	0	1	1	1
female	50	skock、Respiratory failure		leukaemia、renal insufficiency、diabetes、cardiac insufficiency	deaths	0	0	0	2	0	0	0	0	0	273.61		2	0	2	1	2	0	1	1	0	1	1	1
female	50	skock	pneumonia、urinary tract infection	hypertension、pancreatitis、renal insufficiency	deaths	CRE	2	2	1	2	1	0	0	1		0.51	2	0	2	1	2	0	0	2	2	0	1	1
female	50	Coma、skock	intestinal infection	malignant tumor	Request for discharge	0	0	2	0	1	0	0	0	2						2	2	0	1	2	1	0	2	1
female	50		urinary tract infection	renal insufficiency	Request for discharge	1	2	2	0	2	2	1	1	1			1	0	2	1	1	1	0	0	0	1	1	1
female	50		pneumonia、liver abscess	pancreatitis、renal insufficiency	Request for discharge	1	2	2	0	2	0	1	1	0	209	50	1	0	2	2	2	0	1	1	1	1	0	1
male	51		pneumonia、liver abscess	diabetes	29	0	2	2	0	2	1	1	1	0	210	50	1	1	2	2	2	0	1	1	1	0	1	1
male	51		liver abscess	diabetes、hypertension	11	0	1	2	0	1	0	1	1	1			1	0	2	2	1	0	1	0	0	1	1	1
male	51		liver abscess、biliary tract infection、pneumonia	renal insufficiency	25	0	2	2	0	2	0	1	1	1	16.78		1	1	2	1	1	0	1	1	1	1	1	1
male	51		pneumonia	leukaemia、renal insufficiency、diabetes	17	1	0	0	2	0	0	0	0	0	238	3.28	1	0	2	1	1	1	1	1	0	1	2	1
male	51			coronary heart disease、cardiac insufficiency、hypertension、diabetes	331	1	0	1	2	0	1	1	1	1						1	1	1	1	1	1	1	1	1
male	51		pneumonia		16	1	2	2	0	2	1	1	1	1	103.89	24.75	1	1	2	1	1	1	0	0	1	1	1	1
male	51	skock	pneumonia、liver abscess	diabetes	Request for discharge	0	2	2	0	2	0	1	1	0			1	0	2	2	2	0	1	1	0	1	0	1
male	51			leukaemia	Request for discharge	0	0	0	2	0	0	0	0	0			2	0	2	1	1	0	1	0	1	1	2	1
male	51	skock	pneumonia	leukaemia	Request for discharge	1	0	0	2	0	1	0	0	0	24.02	0.07				1	1	0	1	1	1	1	1	1
male	51	skock、Respiratory failure	pneumonia	renal insufficiency、cardiac insufficiency	Request for discharge	CRE	2	2	0	2	0	0	0	1		41.96	1	0	2	1	2	0	1	0	0	0	2	0
female	51			cerebral infarction、hypertension、diabetes	6	0	2	2	0	2	1	1	1	1	301.43	17.72	1	1	1	1	1	1	1	0	0	1	1	1
female	51		pneumonia	leukaemia	30	0	0	0	2	0	0	0	0	0	73.2	0.69				2	1	1	1	1	1	1	1	1
female	51			heart valve disease、cardiac insufficiency	81	1	1	2	0	1	0	0	0	1			2	0	2	1	1	0	1	1	0	0	1	1
female	51			heart valve disease、cardiac insufficiency	72	1	1	2	0	1	0	0	0	1			2	0	2	1	1	0	1	1	1	0	1	1
female	51		urinary tract infection、pneumonia	diabetes、renal insufficiency	17	1	2	2	0	2	1	1	1	1		6	1	1	1	1	1	1	1	0	0	1	1	1
female	51	Respiratory failure、skock	pneumonia	leukaemia、diabetes	deaths	1	0	0	1	0	0	0	0	0	139.19	1.08				1	1	0	1	1	1	0	1	0
male	52			pancreatitis、diabetes	11	0	1	2	0	1	0	1	1	2			1	1	1	1	1	1	1	1	1	0	1	0
male	52		biliary tract infection、urinary tract infection	diabetes	10	0	2	2	0	2	0	1	1	1			1	1	2	1	1	1	1	0	0	1	0	0
male	52		liver abscess、pneumonia	diabetes	38	1	2	2	0	2	0	0	0	1	142		2	0	2	1	1	1	1	0	0	1	1	0
male	52	0	pneumonia	cardiac insufficiency	43	1	2	2	0	2	1	0	0	1		0.27	1	0	2	1	1	1	1	2	2	0	1	1
male	52		pneumonia	leukaemia、hypertension	71	1	0	0	2	0	0	0	0	0						1	1	0	1	0	0	0	1	1
male	52			renal insufficiency	10	1	2	2	0	2	1	1	1	2			1	0	2	1	1	1	1	1	1	1	1	1
male	52		urinary tract infection		11	1	2	2	0	2	0	1	1	1	181	8.46	2	0	2	1	1	0	0	0	0	0	1	0
male	52	Coma、Respiratory failure	pneumonia	Gastrointestinal bleeding、malignant tumor、renal insufficiency	deaths	1	2	2	0	2	1	1	1	0			2	0	2	1	2	0	1	1	0	1	0	1
male	52	skock	pneumonia	renal insufficiency	Request for discharge	0	1	2	0	1	0	0	0	0			1	1	2	2	2	0	1	0	0	1	1	1
male	52	skock		leukaemia、diabetes	Request for discharge	0	0	0	2	0	0	0	0	0			2	0	2	1	1	0	1	1	0	0	2	1
male	52	skock	biliary tract infection、urinary tract infection	renal insufficiency	Request for discharge	1	2	2	0	2	0	2	2	0	216.98	50	2	0	2	2	2	0	1	1	0	1	1	0
female	52	skock	liver abscess	diabetes、renal insufficiency、hypertension	18	0	2	2	0	2	1	0	1	0	347.71	50	1	1	2	2	2	0	0	0	0	1	0	1
female	52		pneumonia	leukaemia	50	CRE	0	0	2	0	0	0	0	0						1	1	1	0	1	1	1	2	1
female	52	Coma、skock	liver abscess	cerebral infarction、renal insufficiency	Request for discharge	0	1	2	0	2	0	0	0	0			2	0	2	2	2	0	1	1	0	0	1	0
female	52	skock、Coma、Respiratory failure	pneumonia、urinary tract infection	malignant tumor、cerebral infarction、diabetes、renal insufficiency	Request for discharge	0	1	2	0	2	1	0	1	0			2	0	2	1	1	0	1	2	2	1	0	1
female	52		urinary tract infection	diabetes	Request for discharge	0	1	2	0	2	1	0	0	2	56.9	0.47				1	1	0	1	0	0	0	1	1
female	52	Respiratory failure	pneumonia	heart valve disease、renal insufficiency	Request for discharge	0	2	2	0	2	1	0	0	1			1	1	2	1	2	0	0	1	1	0	2	1
female	52	Respiratory failure	pneumonia、urinary tract infection	renal insufficiency	Request for discharge	1	1	2	0	1	1	0	0	1			2	0	2	1	1	0	1	2	2	1	0	1
female	52			leukaemia	Request for discharge	1	0	1	2	0	0	0	0	0						1	1	0	1	1	1	1	1	1
female	52	skock	urinary tract infection、pneumonia	diabetes、renal insufficiency	Request for discharge	1	2	2	0	2	1	2	2	1		50	2	0	2	1	1	1	0	0	0	1	1	0
female	52		urinary tract infection	diabetes	Request for discharge	1	2	2	0	2	0	0	1	1	261	34.99	2	0	2	1	1	1	0	0	0	1	0	0
male	53			cerebral infarction、hypertension、diabetes、renal insufficiency、cardiac insufficiency	8	0	2	2	0	2	1	0	0	2	35	1.03	1	1	1	2	1	0	2	0	1	0	1	1
male	53		pneumonia、liver abscess	renal insufficiency、diabetes	30	0	2	0	0	0	1	1	1	0	387	44	1	1	2	2	2	0	1	1	1	1	0	1
male	53		pneumonia、liver abscess	diabetes	15	0	1	2	0	1	1	1	1	1	86.3	1.45	1	1	1	1	1	1	1	1	1	1	1	1
male	53		pneumonia、liver abscess	diabetes	12	0	2	2	0	2	1	1	1	2			1	0	2	1	1	0	0	0	0	1	1	1
male	53		urinary tract infection	malignant tumor、cerebral infarction	21	1	2	2	0	2	0	0	0	2			1	0	2	1	1	0	0	0	0	1	1	1
male	53		intestinal infection		6	1	1	2	0	1	0	1	1	0			1	0	2	1	2	1	1	1	1	1	0	1
male	53			malignant tumor	22	1	1	1	1	1	1	1	1	1						1	1	1	1	0	0	1	1	1
male	53		pneumonia		12	1	0	0	2	0	0	0	0	0	221		1	0	2	1	1	1	1	0	1	1	1	1
male	53	Respiratory failure、skock	pneumonia	renal insufficiency	deaths	1	2	2	0	2	0	0	0	0			2	0	2	1	2	1	2	2	2	0	2	2
male	53	skock、Coma	pneumonia	renal insufficiency	deaths	CRE	2	2	0	2	1	1	1	0			2	0	2	1	2	0	1	2	2	0	1	1
male	53	Coma	pneumonia	renal insufficiency	deaths	CRE	2	2	0	2	1	1	1	0			2	0	2	1	2	0	1	2	2	0	1	1
female	53			malignant tumor、leukaemia	56	0	0	0	2	0	0	0	0	0	248	38.96				1	1	0	1	1	1	1	1	1
female	53		urinary tract infection	diabetes	16	1	2	2	0	2	1	0	1	1		1.81	1	1	2	1	2	0	0	1	0	0	1	1
female	53	skock、Respiratory failure		malignant tumor、renal insufficiency	deaths	0	0	2	0	1	0	0	0	0						1	1	0	0	1	1	0	0	0
female	53	skock、Respiratory failure、Coma	urinary tract infection、pneumonia	cerebral infarction、diabetes、cardiac insufficiency、renal insufficiency	Request for discharge	0	2	2	0	2	1	1	1	1			1	0	2	1	1	1	1	0	0	1	1	0
female	53			leukaemia	Request for discharge	1	0	0	2	0	0	0	0	0						1	1	1	1	1	1	1	1	1
male	54		liver abscess	diabetes、cerebral infarction	11	0	2	2	0	2	1	0	1	0			2	0	2	2	2	0	1	0	0	1	1	0
male	54			Gastrointestinal bleeding、renal insufficiency	7	0	1	2	1	2	1	0	0	1			1	1	1	1	1	0	1	2	2	1	2	1
male	54		urinary tract infection		16	1	1	2	0	1	1	1	1	1			2	0	2	2	1	1	1	1	0	1	1	1
male	54	skock		cardiac insufficiency、diabetes	deaths	1	2	2	0	2	0	0	0	0	151.87		2	0	2	1	1	0	0	1	0	0	1	1
male	54		liver abscess、pneumonia	renal insufficiency	Request for discharge	0	2	2	0	2	0	0	1	0	145	50	1	1	2	2	1	0	1	1	1	0	1	1
male	54	Respiratory failure、skock	pneumonia	hypertension、renal insufficiency、cerebral infarction	Request for discharge	0	1	2	0	1	1	1	1	0	499.5	50	1	0	2	1	2	0	1	1	1	0	1	0
female	54		pneumonia、urinary tract infection	diabetes、renal insufficiency	7	0	2	2	0	2	1	0	0	1	106	3.17				1	2	0	1	1	1	1	1	1
female	54		pneumonia、urinary tract infection	renal insufficiency	20	1	2	2	0	2	1	1	1	0	102	28.21	1	0	2	1	1	0	1	0	0	1	0	0
female	54		pneumonia		46	1	0	0	2	0	0	0	0	0	136.71					1	2	0	1	1	1	1	1	0
female	54		pneumonia、urinary tract infection	heart valve disease、cardiac insufficiency	46	1	1	2	0	1	0	0	0	1	59.58					1	1	1	1	1	1	1	1	1
female	54		pneumonia、urinary tract infection	leukaemia	37	CRE	0	0	2	0	0	0	0	0	110	0.15				1	1	0	0	1	0	1	1	1
female	54	Coma、Respiratory failure、skock		SLE、renal insufficiency、hypertension	Request for discharge	0	0	2	0	1	0	0	0	0	9.91	1.06	2	0	2	1	1	0	1	1	1	0	1	1
male	55		urinary tract infection	hypertension、diabetes	15	0	1	2	0	2	1	1	1	1			1	0	2	1	1	0	0	1	1	1	0	1
male	55		pneumonia	cardiac insufficiency、renal insufficiency	25	0	2	2	0	2	1	1	1	1	79.54	28.83				2	2	1	1	0	0	1	2	2
male	55	0	urinary tract infection		8	CRE	2	2	0	2	1	0	0	1			2	0	2	1	1	0	1	1	0	0	1	0
male	55	skock、Respiratory failure	pneumonia	leukaemia、renal insufficiency	deaths	0	0	2	0	0	0	0	0	0	26.9	0.92				2	2	0	1	0	0	0	1	0
female	55	Coma、skock、Respiratory failure	pneumonia	renal insufficiency、cardiac insufficiency、heart valve disease	21	0	2	2	0	2	0	1	1	1			2	0	2	1	2	1	1	0	0	0	2	0
female	55		urinary tract infection、pneumonia	diabetes、renal insufficiency	11	0	2	2	0	2	1	0	0	1	399	3.95				1	1	0	2	0	0	0	1	1
female	55		biliary tract infection		14	1	0	0	2	0	0	0	0	0						2	1	0	1	1	1	0	1	1
female	55				20	1	2	2	0	2	1	0	0	0						2	2	0	1	1	1	1	1	0
female	55	Respiratory failure、Coma	pneumonia	hypertension、diabetes、renal insufficiency	deaths	0	1	2	0	1	0	1	1	1			2	0	2	2	2	0	0	0	0	0	0	1
male	56			liver cirrhosis	10	0	2	2	0	2	1	1	1	1			2	0	2	1	1	0	1	1	1	1	1	1
male	56		intestinal infection	malignant tumor	51	1	2	2	0	2	0	0	0	1			2	0	2	2	2	1	1	1	0	1	1	1
male	56			malignant tumor	Request for discharge	0	2	2	0	2	1	1	1	1	346.9		2	0	2	2	2	0	1	0	0	2	1	1
male	56		pneumonia、perianal infection	leukaemia、diabetes	Request for discharge	1	0	0	2	0	0	0	0	0	313	50				1	1	1	1	0	0	1	1	1
female	56		pneumonia	pancreatitis	32	0	1	2	0	2	0	0	0	1						1	1	0	1	2	2	0	1	1
female	56		urinary tract infection	renal insufficiency、diabetes	13	0	2	2	0	2	1	0	0	0			2	0	2	1	1	0	1	0	0	1	2	1
female	56		biliary tract infection	renal insufficiency	7	0	1	2	0	1	0	1	1	1			1	1	1	2	2	1	0	0	0	1	0	0
female	56		urinary tract infection	coronary heart disease	18	0	2	2	0	2	1	1	0	1			1	0	2	1	1	1	0	0	0	1	0	1
female	56	0	pneumonia、urinary tract infection	diabetes	14	1	2	2	0	2	1	0	0	0	209.75	1.32	2	0	2	1	1	0	0	1	1	1	1	1
female	56		urinary tract infection	renal insufficiency	14	1	2	2	0	2	1	0	0	2			2	0	2	1	2	0	0	0	0	1	1	1
female	56		urinary tract infection	renal insufficiency、hypertension、diabetes	18	1	2	2	0	2	1	0	0	0			1	1	2	1	2	0	1	0	0	1	1	1
female	56	skock	urinary tract infection、pneumonia	malignant tumor	29	1	0	2	0	0	0	1	1	1	246		2	0	2	1	1	0	1	2	2	0	0	1
female	56		pneumonia	hypertension、cerebral infarction、cardiac insufficiency、renal insufficiency	deaths	CRE	2	2	0	2	0	0	0	0			2	0	2	1	1	0	1	2	2	0	0	2
female	56	DIC	pneumonia	hypertension、cardiac insufficiency、cerebral infarction、renal insufficiency	deaths	CRE	2	2	0	2	0	0	0	0			2	0	2	1	1	0	1	2	2	0	0	2
male	57			malignant tumor	30	0	1	2	0	1	1	0	0	1	67	5				2	2	1	1	1	1	1	1	1
male	57		urinary tract infection	bowel obstruction、renal insufficiency	12	0	1	2	0	1	0	0	0	0	308.8	14.41	1	1	2	1	1	1	1	0	0	1	1	1
male	57	Respiratory failure、skock	pneumonia	bowel obstruction	54	1	2	2	0	2	0	1	1	1			2	0	2	2	2	1	1	1	1	1	0	1
male	57	0	pneumonia	leukaemia、diabetes	32	1	0	0	2	0	0	0	0	19			2	0		2	1	0	1	1	1	1	1	1
male	57		pneumonia	leukaemia、renal insufficiency、diabetes、Gastrointestinal bleeding、cerebral infarction	23	1	2	0	0	0	0	0	0	0			2	0	2	2	2	0	0	1	0	1	0	0
male	57		biliary tract infection	diabetes	16	1	2	2	0	2	0	1	1	1			1	2	1	2	1	1	1	1	1	1	1	1
male	57	Respiratory failure	pneumonia		48	1	1	2	0	1	0	0	0	0			1	1	2	1	2	0	1	0	1	0	0	1
male	57		urinary tract infection、pneumonia	cerebral infarction、renal insufficiency	6	1	2	2	0	2	1	1	1	1		1.42	1	0	2	1	1	1	1	1	1	1	1	1
male	57	skock		liver cirrhosis、renal insufficiency	Request for discharge	0	0	2	0	0	0	1	1	0			2	0	2	2	2	0	1	0	0	1	1	1
male	57	skock、Respiratory failure	pneumonia	renal insufficiency、cardiac insufficiency、malignant tumor、cerebral infarction、hypertension	Request for discharge	1	1	2	0	1	0	0	0	0			1	1	2	1	1	0	1	0	0	1	0	1
male	57	skock、Coma、Respiratory failure	pneumonia、intestinal infection	diabetes、cerebral infarction、renal insufficiency	Request for discharge	1	1	2	0	2	1	0	0	0			2	0	2	1	1	0	0	2	2	1	1	1
male	57		pneumonia		Request for discharge	1	1	2	0	1	1	0	0	0			2	0	2	1	2	0	1	0	0	0	1	1
female	57			bowel obstruction	36	0	2	2	0	2	0	0	0	2			2	0	2	1	1	0	0	1	0	0	0	0
female	57		pneumonia		63	0	1	2	0	1	0	0	0	2	160		1	1	2	2	2	0	1	1	1	1	0	1
female	57	skock	urinary tract infection	diabetes、renal insufficiency	13	0	2	2	0	2	1	0	0	2			1	1	2	1	1	1	0	0	0	1	1	1
female	57		intestinal infection	Gastrointestinal bleeding、malignant tumor	12	0	0	2	0	0	0	0	0	0	13.9		1	1	2	1	1	0	0	1	1	0	1	1
female	57		urinary tract infection	renal insufficiency	23	0	1	2	0	2	0	0	0	0			1	1	2	1	1	0	1	1	1	0	2	1
female	57		urinary tract infection、pneumonia	renal insufficiency、hypertension	7	0	1	2	0	2	0	1	1	1			2	0	2	2	2	1	0	1	1	1	0	0
female	57	skock、Coma	pneumonia、urinary tract infection	renal insufficiency、SSc	7	1	2	2	0	2	0	0	0	0			2	0	2	1	2	0	1	0	0	0	2	0
female	57		urinary tract infection、pneumonia	diabetes、renal insufficiency	6	1	1	2	0	1	1	0	0	2			1	1	2	1	1	0	1	0	0	1	1	1
female	57			leukaemia、DIC	Request for discharge	0	0	0	2	0	0	0	0	0	83.5	5.07				2	1	1	1	1	1	1	1	1
female	57		urinary tract infection	hypertension、diabetes	Request for discharge	0	2	2	0	2	1	0	0	1		3.16	1	1	2	1	1	0	0	0	1	0	1	0
female	57			leukaemia	Request for discharge	CRE	0	0	2	0	0	0	0	0						1	1	1	1	1	1	1	1	1
male	58		urinary tract infection	liver cirrhosis	50	0	1	2	0	2	1	0	0	0			2	0	2	1	1	0	1	1	1	0	1	1
male	58		pneumonia、liver abscess	diabetes、renal insufficiency、cerebral infarction	14	0	2	2	0	2	1	2	2	1	297	7.68	1	0	1	1	1	1	1	0	0	1	0	1
male	58		pneumonia	cerebral infarction、Gastrointestinal bleeding	30	0	2	2	0	2	1	1	1	0	193	30.8	2	0	2	1	1	0	1	1	1	0	1	1
male	58		liver abscess	liver cirrhosis	14	0	2	2	0	2	1	0	0	2	198	0.93	2	0	2	2	2	0	0	1	1	0	0	0
male	58		urinary tract infection	renal insufficiency	12	0	2	2	0	2	0	1	1	1			2	0	2	1	1	0	1	1	1	1	0	0
male	58	Respiratory failure、Coma	pneumonia		16	1	1	2	0	1	0	0	0	1	12.68		2	0	2	2	2	1	1	1	1	1	1	1
male	58		pneumonia	hypertension、diabetes	Request for discharge	0	2	2	0	2	1	1	1	1			2	0	1	1	1	1	0	1	0	1	1	0
male	58	Respiratory failure、Coma	pneumonia		Request for discharge	0	2	2	0	2	1	0	0	0			2	0	2	1	1	0	1	2	1	0	1	1
male	58	skock	urinary tract infection、pneumonia	bowel obstruction、renal insufficiency、Gastrointestinal bleeding、diabetes、hypertension	Request for discharge	0	2	2	0	2	0	0	0	0			2	0	2	1	1	0	1	1	1	0	2	1
female	58		liver abscess		9	0	2	2	0	2	0	0	0	2	179	45.64	2	0	2	2	2	0	1	0	0	0	1	1
female	58		urinary tract infection	coronary heart disease、cardiac insufficiency、renal insufficiency	6	0	2	2	0	2	0	1	1	0	239	50	2	0	2	1	2	0	1	0	0	0	2	1
female	58		urinary tract infection		19	0	1	2	0	1	1	1	1	0	13.6	27.54	1	1	2	2	2	1	1	0	0	1	0	1
female	58		urinary tract infection	coronary heart disease	6	1	2	0	2	2	1	1	1	1			1	1	1	2	2	1	0	1	1	1	1	1
female	58		urinary tract infection		4	1	2	2	0	2	0	0	0	1	176					1	1	0	1	1	1	0	1	1
female	58	Respiratory failure、Coma	pneumonia		38	1	2	2	0	2	0	0	0	1			1	1	2	1	2	0	1	2	1	1	0	1
female	58		biliary tract infection		3	1	2	2	0	2	1	1	1	1	116.18		1	1	2	1	1	1	0	0	0	1	1	1
female	58		pneumonia	coronary heart disease	8	1	0	1	1	0	0	1	1	0			1	1	2	1	1	0	1	1	1	0	0	0
female	58		urinary tract infection	cerebral infarction、renal insufficiency、heart valve disease	22	1	2	2	0	2	1	0	1	0			1	1	2	1	2	0	0	1	0	0	0	1
male	59		pneumonia、liver abscess	renal insufficiency、diabetes	42	0	2	2	0	2	1	0	1	1			2	0	2	2	2	0	0	0	0	0	1	1
male	59		pneumonia、liver abscess	renal insufficiency	8	0	1	2	0	2	0	0	1	1			1	0	2	2	2	0	0	0	0	1	0	1
male	59	Respiratory failure、Coma	pneumonia	hypertension、renal insufficiency	19	0	1	2	0	1	0	0	0	1			1	1	2	1	1	1	1	2	2	1	1	1
male	59		urinary tract infection		16	0	1	2	0	1	0	1	1	1			1	1	2	1	1	1	1	1	1	1	1	1
male	59		urinary tract infection、pneumonia	diabetes	130	0	1	1	1	1	0	0	0	2	84.64	0.24	2	0	2	1	1	1	2	0	1	1	1	1
male	59	skock	pneumonia	cerebral infarction、renal insufficiency、hypertension、diabetes	27	1	1	2	0	1	1	0	0	1			1	1	2	1	1	1	1	0	1	1	1	1
male	59	Respiratory failure	pneumonia	COPD	Request for discharge	1	1	2	0	1	0	0	0	2			2	0	2	1	1	1	1	1	1	0	1	0
male	59		pneumonia、biliary tract infection	malignant tumor	Request for discharge	1	2	2	0	2	0	1	1	2			2	0	2	2	2	0	0	1	1	2	1	1
male	59	skock、Respiratory failure	pneumonia	leukaemia、malignant tumor、renal insufficiency	Request for discharge	CRE	2	0	2	0	2	0	0	0						1	1	1	1	1	1	1	2	1
female	59		liver abscess、urinary tract infection	cerebral infarction、hypertension、diabetes	24	0	1	2	0	2	0	0	1	1			1	0	2	2	2	0	0	0	0	1	1	1
female	59		urinary tract infection	diabetes、hypertension、renal insufficiency、cerebral infarction	13	0	1	2	0	2	1	1	1	1						1	1	1	1	0	0	1	1	1
female	59		pneumonia、urinary tract infection	heart valve disease、cardiac insufficiency、renal insufficiency	29	1	2	2	0	2	1	0	0	0			2	0	2	2	2	1	1	2	1	0	0	2
female	59		urinary tract infection	cerebral infarction、renal insufficiency	7	1	2	2	0	2	1	1	1	1	104	3.22	2	0	2	2	2	0	0	0	0	0	1	1
female	59		pneumonia	renal insufficiency	25	1	1	2	0	2	1	0	0	2			2	0	2	1	2	0	1	1	0	1	1	1
female	59	skock、Respiratory failure	pneumonia、biliary tract infection	cardiac insufficiency	17	1	2	2	0	2	1	0	0	1			2	0	2	1	2	0	0	1	1	0	0	0
female	59	Respiratory failure、skock、Coma	pneumonia	renal insufficiency、diabetes、cerebral infarction	deaths	1	2	2	0	2	0	1	1	0			1	1	2	1	1	0	1	1	1	1	1	1
female	59	skock、Coma	urinary tract infection	cardiac insufficiency、malignant tumor、renal insufficiency	Request for discharge	1	2	2	0	2	1	1	1	0			2	0	2	2	2	0	1	1	0	0	2	1
female	59	skock、Respiratory failure	pneumonia、urinary tract infection	renal insufficiency	Request for discharge	1	2	2	0	2	0	1	1	0	335	7.04	1	0	2	1	1	0	1	1	1	0	1	1
female	59	Coma	urinary tract infection	diabetes、renal insufficiency	Request for discharge	1	2	2	0	2	1	1	1	1			2	0	2	1	1	0	1	0	0	0	1	1
male	60		pneumonia、liver abscess	diabetes、renal insufficiency	20	0	2	2	0	2	1	1	1	0		50	1	1	2	2	2	0	0	0	0	0	1	0
male	60		liver abscess	coronary heart disease、hypertension	4	0	2	2	0	2	0	2	1	1	47.37	1.6	2	0	1	2	2	1	1	1	0	1	1	0
male	60		pneumonia、liver abscess	coronary heart disease、hypertension、diabetes	16	0	2	2	0	2	1	1	1	0		6.57	1	0	2	2	2	0	1	0	0	1	1	1
male	60	skock	pneumonia、liver abscess	diabetes	15	0	2	2	0	2	0	1	1	0	287.65	23.81	1	0	2	2	2	0	1	0	0	0	0	1
male	60		pneumonia	diabetes、leukaemia	25	0	0	2	0	0	0	0	0	0	75.23	1.75	2	0	2	1	1	0	0	1	0	0	0	1
male	60		liver abscess	diabetes、hypertension、renal insufficiency	15	0	2	2	0	2	1	1	1	1			2	0	1	2	2	1	1	0	0	1	2	1
male	60	0	liver abscess	hypertension、diabetes、cerebral infarction	16	1	2	2	0	2	0	1	1	1	239.95	14.2	2	0	2	1	2	1	1	1	1	1	0	0
male	60		urinary tract infection、pneumonia	renal insufficiency	9	1	1	2	0	1	1	1	1	0			1	2	2	1	1	0	1	1	0	1	2	1
male	60			coronary heart disease、hypertension、diabetes、cerebral infarction、malignant tumor	36	1	2	2	0	2	0	0	0	1			2	0	2	1	1	1	1	1	1	0	1	1
male	60		urinary tract infection		49	1	1	1	0	1	1	1	1	1			1	1	1	2	1	1	1	1	1	1	1	1
male	60	skock		DN、renal insufficiency	Request for discharge	0	0	1	1	0	0	1	1	0	306	50	1	0	2	1	2	0	0	0	0	0	0	0
male	60		pneumonia	hypertension、renal insufficiency	Request for discharge	1	2	0	2	1	1	1	1	0	196.33	6.26	1	1	2	2	2	1	0	0	0	1	1	1
male	60		urinary tract infection、pneumonia	renal insufficiency、diabetes	Request for discharge	1	2	2	0	2	1	0	1	1		16.97	2	0	2	1	1	0	1	1	1	0	0	1
male	60	skock	pneumonia	Gastrointestinal bleeding、liver cirrhosis、bowel obstruction	Request for discharge	1	2	2	0	2	1	1	0	1		0.15	2	0	2	1	1	1	1	0	0	0	1	1
female	60		pneumonia、liver abscess		23	0	2	2	0	2	1	1	1	1	247.3		2	0	2	2	2	0	0	0	0	1	1	1
female	60	skock	pneumonia	renal insufficiency、malignant tumor、hypertension、diabetes	14	0	2	2	0	2	1	0	1	0			2	0	2	1	1	0	1	0	0	0	1	1
female	60		pneumonia	leukaemia	25	1	0	0	2	0	1	0	0	0	15.2	4.14	2	0	2	1	1	0	1	1	1	0	0	1
female	60		urinary tract infection、pneumonia	cerebral infarction、renal insufficiency、diabetes	10	1	1	2	0	1	1	1	1	1		3.02	1	1	2	1	1	0	1	0	0	0	1	1
female	60			cardiac insufficiency、heart valve disease、cerebral infarction、renal insufficiency	Request for discharge	0	2	2	0	2	1	0	1	0	298.22		1	0	2	1	2	0	0	0	0	1	1	0
female	60	0	pneumonia	leukaemia	Request for discharge	CRE	0	2	0	0	0	0	0	0			2	0	2	1	1	0	1	1	0	1	1	1
male	61	skock	liver abscess、pneumonia	coronary heart disease、renal insufficiency、cerebral infarction	15	0	2	2	0	2	0	1	1	0	277.61	50	1	0	2	2	2	0	0	1	0	1	1	0
male	61		pneumonia、liver abscess	diabetes、hypertension、cerebral infarction	27	0	2	2	0	2	1	1	1	0	220	25.31	1	0	2	2	2	0	1	1	0	1	0	1
male	61		perianal infection	leukaemia、diabetes	28	CRE	0	0	2	0	0	0	0	0			1	1	2	1	1	1	0	1	0	0	1	0
male	61			malignant tumor、hypertension	19	CRE	0	1	1	0	1	1	1	1	43.8	33.47	1	1	2	1	1	1	2	1	0	1	1	1
male	61	Respiratory failure		cerebral infarction	deaths	0	1	2	0	2	1	1	1	1	105	1.59	1	1	1	1	1	1	1	1	0	1	1	1
female	61		urinary tract infection	cerebral infarction	9	1	1	2	0	2	1	0	1	2						1	1	1	0	1	1	1	2	1
female	61		pneumonia、biliary tract infection	malignant tumor	24	1	2	2	0	2	1	0	0	2						1	1	0	0	0	0	0	1	1
female	61	skock、Coma、Respiratory failure	urinary tract infection、pneumonia	renal insufficiency、cerebral infarction、RA	deaths	0	2	2	0	2	1	0	0	0			2	0	2	2	2	0	1	2	0	0	2	1
female	61		pneumonia	leukaemia、RA、renal insufficiency、hypertension	Request for discharge	0	0	0	2	0	1	0	0	0	118	0.18	1	1	1	1	1	0	1	0	0	1	2	1
female	61	Coma	pneumonia	cardiac insufficiency、diabetes、cerebral infarction	Request for discharge	0	2	2	0	2	1	1	1	0	375.71	11.89	1	1	2	1	1	0	0	1	1	1	0	1
female	61		pneumonia	coronary heart disease、hypertension、diabetes、renal insufficiency	Request for discharge	0	2	2	0	2	1	0	0	1			1	1	2	1	1	0	0	0		0	0	2
female	61	skock	urinary tract infection	hypertension、diabetes、renal insufficiency	Request for discharge	1	2	2	0	2	0	1	1	1			2	0	2	1	2	0	1	1	0	1	0	0
male	62		liver abscess		15	0	2	2	0	2	0	1	1	0	172	50	1	1	1	2	1	1	1	1	1	1	1	1
male	62			coronary heart disease、diabetes	12	0	1	2	0	2	0	0	0	1			2	0	2	2	2	0	1	0	0	1	1	0
male	62	skock	pneumonia、liver abscess	liver cirrhosis、renal insufficiency	30	0	1	2	0	2	0	1	1	1			1	0	2	2	2	1	0	1	1	1	0	1
male	62			coronary heart disease、hypertension	7	0	2	2	0	2	1	1	1	0	59.11	29.43	1	1	2	2	2	0	0	1	0	1	0	1
male	62		pneumonia、urinary tract infection	renal insufficiency	20	0	2	2	0	2	1	1	1	1			2	0	2	1	1	1	1	1	0	1	1	1
male	62	skock、Coma	liver abscess	diabetes	30	0	1	2	0	1	0	1	1	0			1	1	2	2	2	0	1	1	0	1	0	1
male	62		urinary tract infection	renal insufficiency	16	0	2	2	0	2	1	0	0	0	204.03	50	1	1	2	1	1	0	0	0	0	0	1	1
male	62		pneumonia、urinary tract infection	renal insufficiency、diabetes	47	1	2	2	0	2	1	0	0	1			2	0	2	1	1	0	1	1	0	0	1	1
male	62	skock	pneumonia	hypertension、renal insufficiency	50	1	1	2	0	1	1	0	0	2			1	1	2	2	2	0	2	2	2	1	1	1
male	62		pneumonia	coronary heart disease、hypertension、diabetes、cardiac insufficiency、cerebral infarction	28	1	2	2	0	2	0	0	0	2	200.17	17.1				1	2	1	1	1	1	0	1	1
male	62		urinary tract infection	malignant tumor	34	1	1	2	0	2	1	0	0	1						1	1	1	1	0	0	0	1	1
male	62		pneumonia	cerebral infarction、hypertension、renal insufficiency、Gastrointestinal bleeding	5	1	2	2	0	2	1	1	1	1			1	1	2	1	1	1	0	1	1	1	1	1
male	62		pneumonia	leukaemia、diabetes	34	CRE	0	0	2	0	0	0	0	0	159	13.69				1	1	0	1	1	1	1	1	1
male	62	skock、Respiratory failure	biliary tract infection	malignant tumor、cardiac insufficiency、Gastrointestinal bleeding、cerebral infarction	deaths	1	0	1	1	0	0	0	0	0	209.73	50	2	0	2	1	1	0	1	0	0	0	0	1
male	62	skock	liver abscess	renal insufficiency、cardiac insufficiency、cerebral infarction、DIC	Request for discharge	0	2	0	0	0	0	1	1	0	12.71	50	2	0	2	2	2	0	1	0	0	0	2	2
male	62			malignant tumor、Gastrointestinal bleeding、renal insufficiency、hypertension、diabetes	Request for discharge	1	0	0	2	0	0	0	0	0	259	50	2	0	2	1	2	0	1	0	1	1	0	1
male	62	Respiratory failure	pneumonia		Request for discharge	CRE	1	2	0	1	0	0	0	1			2	0	2	2	2	0	1	0	0	0	0	1
female	62		urinary tract infection	diabetes	12	0	2	2	0	2	1	1	1	0	113	4.31	2	0	2	1	2	0	0	1	1	0	0	1
female	62			hypertension、、diabetes、cerebral infarction	15	0	2	2	0	2	1	1	1	1	82.7	13.84	1	1	2	2	2	1	1	1	0	1	2	1
female	62	skock	pneumonia、urinary tract infection	cardiac insufficiency、hypertension、diabetes	30	0	1	2	0	1	0	1	1	0			1	1	2	1	1	0	1	1	1	1	0	1
female	62			cerebral infarction、renal insufficiency	8	0	2	2	0	2	0	0	0	1	13.53	50	1	1	0	1	1	0	1	1	1	1	0	0
female	62		urinary tract infection	coronary heart disease、renal insufficiency	5	1	2	0	2	2	1	1	1	1	270.17	22	1	1	2	1	1	0	1	0	0	1	1	0
female	62	skock	urinary tract infection、pneumonia		Request for discharge	1	2	2	0	2	1	1	1	1	127.99		2	0	2	1	1	1	0	1	1	1	0	1
male	63		pneumonia、liver abscess	coronary heart disease、cardiac insufficiency、renal insufficiency	18	0	2	2	0	2	1	1	1	1	90.36	25.55	2	0	1	1	1	1	1	1	0	1	0	1
male	63		liver abscess		5	0	2	2	0	2	0	1	1	1			1	1	2	2	2	0	0	0	1	1	0	1
male	63	skock	pneumonia	cardiac insufficiency、renal insufficiency、ARDS	52	0	2	2	0	2	0	1	1	1			2	0	2	2	2	1	1	1	1	1	0	0
male	63		pneumonia	coronary heart disease、diabetes	28	0	2	2	0	2	0	1	1	1			2	0	2	2	2	0	1	0	0	1	0	1
male	63		urinary tract infection	cardiac insufficiency、renal insufficiency、cerebral infarction	7	0	2	2	0	2	1	1	1	1						2	2	0	0	1	0	0	0	1
male	63	Coma、Respiratory failure	pneumonia	hypertension	16	0	2	2	0	2	1	1	1	1			1	1	2	1	1	0	1	2	1	1	1	1
male	63		pneumonia、urinary tract infection	cerebral infarction	14	1	1	2	0	2	0	0	1	1			1	1	2	2	1	0	1	0	0	1	0	1
male	63	skock、Respiratory failure	perianal infection	leukaemia、diabetes	deaths	1	0	0	2	0	0	0	0	0	124	0.35	2	0	2	1	1	0	1	1	1	0	0	1
male	63	skock、Respiratory failure	pneumonia	renal insufficiency	deaths	1	2	2	0	2	0	0	0	0			2	0	2	1	1	0	1	2	1	1	0	1
male	63	skock		leukaemia、diabetes	deaths	CRE	0	0	2	0	0	0	0	0	124		1	1	2	1	1	0	1	1	1	0	0	1
male	63	Respiratory failure、skock	perianal infection	leukaemia、diabetes	deaths	CRE	0	0	2	0	0	0	0	0	124	0.35	2	0	2	1	1	0	1	1	1	0	0	1
male	63		pneumonia	hypertension、malignant tumor、renal insufficiency	Request for discharge	0	2	2	0	2	0	0	0	1	35.8	49	1	1	2	1	1	1	1	1	1	0	0	1
male	63	skock、Coma	pneumonia	coronary heart disease、diabetes、renal insufficiency	Request for discharge	1	1	2	1	2	1	0	0	1	143.91		2	0	2	1	1	0	1	1	1	1	0	1
male	63		pneumonia	cerebral infarction	Request for discharge	1	0	0	2	0	0	0	0	0	213	1.43	2	0	2	1	1	0	1	1	1	1	1	1
male	63	skock、Coma	urinary tract infection、pneumonia	cerebral infarction、renal insufficiency、 diabetes	Request for discharge	1	2	2	0	2	1	0	0	1			2	0	2	1	1	0	0	1	1	0	0	1
female	63		pneumonia、liver abscess	diabetes	35	0	2	2	0	2	1	0	0	1	224.76	15.24	1	1	2	2	2	0	0	0	0	0	0	0
female	63			renal insufficiency	6	0	2	2	0	2	1	0	0	1	15.46	7.44				1	1	0	1	0	1	0	1	1
female	63	skock	pneumonia、urinary tract infection	Gastrointestinal bleeding、bowel obstruction、diabetes	13	0	2	2	0	2	0	0	0	1	235	0.89	1	0	2	2	2	0	1	2	1	0	0	0
female	63			hypertension、coronary heart disease	8	0	2	2	0	2	1	1	1	1			1	1	1	1	1	1	1	0	0	1	1	1
female	63		urinary tract infection、pneumonia	diabetes、renal insufficiency	23	0	2	2	0	2	1	0	0	0	153	5.15				1	1	0	1	0	1	0	1	0
female	63		urinary tract infection、pneumonia	cerebral infarction、renal insufficiency	8	1	2	2	0	2	0	1	1	1	210	2.41	1	1	1	1	1	1	1	1	1	1	1	1
female	63			malignant tumor、renal insufficiency	8	1	2	2	0	2	0	0	1	1						1	1	0	1	1	1	1	1	1
female	63		urinary tract infection	cerebral infarction、diabetes	5	1	2	2	0	2	1	1	1	1			1	1	1	1	1	1	0	0	0	1	1	0
female	63	skock、Respiratory failure	intestinal infection	bowel obstruction、malignant tumor、cerebral infarction、coronary heart disease	deaths	1	0	2	0	0	0	0	0	0	56	0.76	2	0	2	1	1	1	1	1	0	1	1	1
female	63	skock、Respiratory failure	urinary tract infection、pneumonia	renal insufficiency、diabetes	Request for discharge	0	2	2	0	2	1	1	1	0			2	0	2	2	2	1	1	1	1	0	2	1
male	64		liver abscess、urinary tract infection	diabetes、renal insufficiency	8	0	1		0	1	0	1	1	0			1	0	2	2	2	0	1	0	0	1	1	1
male	64			diabetes、cerebral infarction、malignant tumor	11	0	2	2	0	2	1	0	0	1	77.91		1	0	2	1	1	0	1	0	0	1	1	1
male	64		biliary tract infection	coronary heart disease、diabetes	10	0	0	2	0	1	0	1	1	1	8.26		1	1	2	2	2	1	0	1	1	2	0	0
male	64		pneumonia、biliary tract infection	diabetes、coronary heart disease、renal insufficiency	11	0	1	2	0	2	0	2	2	0	15.31	27.56	2	0	2	1	1	1	1	1	0	1	0	1
male	64		pneumonia	heart valve disease、cardiac insufficiency	deaths	CRE	1	2	0	2	1	0	0	0			2	0	2	1	2	1	1	2	2	1	1	1
male	64	Respiratory failure、skock	pneumonia	heart valve disease、cardiac insufficiency	deaths	CRE	1	2	0	2	1	0	0	0			2	0	2	1	2	1	1	2	2	1	1	1
male	64			leukaemia、hypertension	Request for discharge	0	0	0	2	0	0	0	0	0	59.7	0.28	1	0	1	1	1	1	0	0	0	1	1	1
male	64	Respiratory failure、skock	pneumonia	Gastrointestinal bleeding、renal insufficiency、cardiac insufficiency、cerebral infarction	Request for discharge	0	0	2	1	1	0	1	1	1			1	1	2	1	2	1	1	1	0	1	0	0
male	64	Respiratory failure	pneumonia	malignant tumor	Request for discharge	0	1	2	0	2	0	1	1	0		1.67	1	1	2	1	1	0	1	0	0	0	1	1
male	64	Respiratory failure、Coma		hypertension、	Request for discharge	1	1	2	0	1	0	1	1	1		6.81	2	0	2	2	2	0	1	1	0	1	1	1
male	64	skock、Coma	biliary tract infection	renal insufficiency	Request for discharge	1	2	2	0	2	1	0	0	0		50	1	1	2	2	2	0	0	0	0	0	1	1
female	64		pneumonia	hypertension、diabetes、cerebral infarction、renal insufficiency	15	0	2	2		2	0	1	1	0	272	50	2	0	2	2	2	1	1	1	0	1	2	0
female	64		urinary tract infection	cerebral infarction、diabetes、hypertension、coronary heart disease	12	0	2	2	0	2	1	0	1	1			2	0	2	1	1	0	1	0	1	0	1	1
female	64	skock	urinary tract infection、pneumonia	renal insufficiency	9	0	2	2	0	2	1	0	0	0		27.68	1	0	2	1	1	0	1	1	1	1	1	0
female	64	Respiratory failure、skock	pneumonia、urinary tract infection	cerebral infarction、renal insufficiency	9	0	1	2	0	1	0	1	1	1		42.41	2	0	2	1	1	1	1	1	0	1	1	0
female	64		biliary tract infection		8	0	1	2	0	1	0	1	0	0			1	0	2	1	2	0	1	1	1	1	1	1
female	64				27	0	2	2	0	2	1	1	1	2			1	0	2	2	2	0	0	1	0	1	1	1
female	64	Respiratory failure	pneumonia、liver abscess	diabetes	20	0	1	2	0	2	0	1	1	1	305.72		2	0	2	2	2	0	1	1	1	1	1	1
female	64	Coma、skock	pneumonia、liver abscess	diabetes、renal insufficiency、Gastrointestinal bleeding	18	0	2	2	0	2	1	0	0	0		8.37	2	0	2	2	2	0	1	1	1	0	0	1
female	64		urinary tract infection、biliary tract infection	diabetes、renal insufficiency	19	0	2	2	0	2	1	1	1	1			1	0	2	2	2	1	1	1	1	1	2	1
female	64		urinary tract infection、pneumonia	renal insufficiency、hypertension	7	0	0	2	0	1	0	0	0	1			2	0	2	1	2	0	1	0	0	1	1	1
female	64	Coma、Respiratory failure	pneumonia	cerebral infarction、Gastrointestinal bleeding、hypertension、diabetes、renal insufficiency	27	1	1	2	0	1	1	0	0	1			1	1	2	1	1	0	1	0	0	1	1	1
female	64		pneumonia、urinary tract infection		21	1	2	2	0	2	1	0	0	1			2	0	2	1	1	0	0	1	1	0	0	0
female	64		pneumonia	diabetes、renal insufficiency	14	1	2	0	0	0	1	0	0	0	129	33.3	1	2	2	1	1	0	0	1	0	0	0	1
female	64		urinary tract infection、pneumonia		7	1	2	2	0	2	0	0	0	1	136	5.85	1	1	2	1	1	0	1	0	0	1	1	1
female	64	skock、Respiratory failure	pneumonia、urinary tract infection	renal insufficiency、cerebral infarction	deaths	1	2	2	0	2	0	0	0	0			2	0	2	1	1	0	1	0	1	1	1	2
female	64		urinary tract infection	coronary heart disease、cardiac insufficiency、hypertension、renal insufficiency、heart valve disease	Request for discharge	0	2	2	0	2	1	1	1	1		21.94	2	0	2	1	1	1	1	0	0	1	0	0
female	64		urinary tract infection	coronary heart disease、hypertension、renal insufficiency	Request for discharge	0	2	2	0	2	0	0	0	1	273.28	50	2	0	2	2	2	0	1	0	0	1	1	1
female	64	skock、Respiratory failure、Coma	pneumonia		Request for discharge	1	2	2	0	2	1	0	0	2			2	0	2	1	2	0	1	2	1	2	2	1
female	64	skock、Respiratory failure	pneumonia	heart valve disease、cardiac insufficiency、cerebral infarction	Request for discharge	1	2	2	0	2	0	0	0	1	172.99					1	1	1	1	1	1	1	1	1
female	64	skock	pneumonia	pancreatitis	Request for discharge	CRE	1	2	0	2	0	0	0	0	113	17.38	2	0	2	1	1	0	0	1	0	0	1	1
male	65	skock	pneumonia	Gastrointestinal bleeding、renal insufficiency	11	0	2	2	0	2	1	0	0	1			2	0	2	1	2	0	2	1	1	0	0
male	65		pneumonia	coronary heart disease、diabetes	8	0	1	2	0	1	0	1	1	0			1	1	2	2	2	1	0	0	0	0	0	1
male	65			renal insufficiency	27	0	0	0	2	0	0	0	0	0	146	11.19				1	1	1	1	1	1	1	2	1
male	65		pneumonia、urinary tract infection	bowel obstruction、	18	0	1	0	1	0	0	0	0	1	152		2	0	2	1	1	1	1	1	1	0	1	1
male	65		urinary tract infection、pneumonia	hypertension	30	0	2	2	0	2	1	1	1	0			2	0	2	1	1	0	0	1	1	1	0	1
male	65	0	pneumonia	cardiac insufficiency、hypertension	44	1	2	0	0	2	1	1	1	1			1	0	1	2	2	0	1	2	1	1	1	1
male	65	skock	pneumonia	hypertension、diabetes、renal insufficiency	76	CRE	1	2	0	1	1	0	0	1			1	1	2	1	1	0	1	1	1	1	1	1
male	65		intestinal infection	Gastrointestinal bleeding	Request for discharge	0	2	2	0	2	1	0	0	1			2	0	2	2	2	1	1	1	1	1	1	1
male	65		urinary tract infection、pneumonia	liver cirrhosis、renal insufficiency	Request for discharge	1	2	2	0	2	1	0	0	0	83.55		2	0	2	1	2	0	1	0	0	1	1	1
male	65	Respiratory failure、skock	pneumonia	cerebral infarction、cardiac insufficiency	Request for discharge	CRE	2	2	0	2	1	0	0	0	143.89		2	0	2	1	1	1	1	1	1	1	1	1
female	65		urinary tract infection	coronary heart disease、diabetes、cerebral infarction	9	0	1	2	0	2	1	1	1	2	14.18		1	1	2	2	1	1	0	0	0	1	0	1
female	65			malignant tumor	17	0	2	2	0	2	1	0	0	1						1	1	0	0	1		0	1	1
female	65		pneumonia、liver abscess	diabetes	9	0	2	2	0	2	1	1	1	1	13.71	24.19	1	1	2	2	1	1	1	1	1	1	1	1
female	65		liver abscess	coronary heart disease、diabetes、renal insufficiency	8	0	1	2	0	1	0	1	1	0	106.85		2	0	2	1	2	0	1	1	0	1	1	1
female	65		urinary tract infection	coronary heart disease、diabetes、renal insufficiency	9	0	2	2	0	2	0	0	1	0			1	1	2	2	2	0	1	0	0	1	1	1
female	65	skock	urinary tract infection、pneumonia	cerebral infarction、hypertension、coronary heart disease、renal insufficiency	16	0	2	2	0	2	0	1	1	1	283.54	35.14	1	1	2	1	1	0	1	0	0	1	1	1
female	65	Respiratory failure	pneumonia	heart valve disease、cardiac insufficiency、hypertension、cerebral infarction	52	1	1	2	0	2	1	1	1	1	94.52	1.82				1	1	1	1	1	0	1	0	1
female	65		urinary tract infection、pneumonia	cardiac insufficiency、renal insufficiency	Request for discharge	0	2	2	0	2	1	1	1	2	259.13	0.61	1	0	2	2	2	0	0	1	1	1	1	1
female	65		urinary tract infection、pneumonia	hypertension、diabetes、cerebral infarction、renal insufficiency	Request for discharge	0	2	2	0	2	1	0	0	1			1	1	2	1	1	0	1	0	1	1	1	1
male	66		pneumonia、liver abscess	coronary heart disease、hypertension、diabetes、renal insufficiency	25	0	1	2	0	1	0	2	2	0			2	0	2	2	2	0	1	1	0	1	0	1
male	66			malignant tumor	24	0	1	2	0	2	0	0	0	1	143	25				2	1	1	1	1	1	1	1	1
male	66		urinary tract infection		16	0	2		0	2	1	1	1	1			2	0	2	1	1	1	1	1	1	1	1	1
male	66			coronary heart disease、pancreatitis、RA	11	0	1	2	0	1	0	1	1	0			1	1	2	2	2	1	0	0	0	1	0	1
male	66		pneumonia	leukaemia、renal insufficiency	28	0	0	0	2	0	0	0	0	0	115	0.78				1	1	0	1	1	1	0	1	1
male	66		perianal infection	leukaemia、renal insufficiency	13	0	0	0	2	0	0	0	0	0	277	50	2	0	1	1	1	1	1	1	1	1	0	1
male	66			diabetes	19	0	2	2	0	2	1	1	1	1	109.36	1.12	2	0	1	1	2	1	1	0	0	1	1	1
male	66	0		cardiac insufficiency、hypertension	23	1	2	2	0	2	1	1	1	1			1	1	1	2	1	1	1	1	1	1	1	1
male	66	skock	biliary tract infection、pneumonia	renal insufficiency	10	1	1	2	0	1	0	1	1	1			1	1	2	2	2	1	1	0	0	1	1	1
male	66		pneumonia	renal insufficiency、hypertension、diabetes	13	1	1	2	0	2	0	0	0	0		50	2	0	2	1	1	1	1	0	0	1	1	1
male	66	Coma	pneumonia	diabetes、renal insufficiency、Gastrointestinal bleeding、hypertension、cardiac insufficiency	deaths	0	2	2	0	2	0	1	1	1			1	1	2	1	1	0	1	2	2	1	1	1
male	66			hypertension	Request for discharge	0	2	2	0	2	1	0	0	2			2	0	1	2	2	0	0	0	0	1	1	1
male	66	Coma、skock、Respiratory failure	pneumonia	malignant tumor、cardiac insufficiency、renal insufficiency、diabetes	Request for discharge	1	0	0	2	0	0	1	1	0			2	0	1	1	1	0	1	0	1	1	1	0
male	66			diabetes、bowel obstruction、renal insufficiency、malignant tumor	Request for discharge	1	2	2	0	2	0	0	0	1	124.26	50	2	0	2	1	1	1	1	0	0	1	1	0
male	66	Respiratory failure	pneumonia、urinary tract infection	pancreatitis、renal insufficiency、coronary heart disease、diabetes	Request for discharge	CRE	1	2	0	2	0	1	1	0	270.25	50	2	0	2	2	2	0	1	1	0	0	2	1
female	66		pneumonia、liver abscess	diabetes	18	0	2	2	0	2	1	1	1	1		1.37	1	0	2	1	2	1	1	0	0	1	0	1
female	66		liver abscess、urinary tract infection	diabetes	12	0	1	2	0	1	0	0	1	1			2	0	2	2	2	1	1	0	0	1	0	1
female	66		urinary tract infection	liver cirrhosis	5	0	0	1	1	1	1	0	1	0	105.68	2.82	2	0	2	1	1	0	0	0	0	1	0	1
female	66	skock	pneumonia	renal insufficiency	13	0	2	2	0	2	0	0	0	0	250.44		2	0	2	1	1	0	1	1	1	0	1	1
female	66	skock	urinary tract infection	renal insufficiency、diabetes	36	0	2	2	0	2	1	0	0	2	192.68		2	0	2	1	1	0	1	0	0	0	2	1
female	66	0	pneumonia	cardiac insufficiency、cerebral infarction	40	1	2	2	0	2	1	1	1	1			1	1	1	1	1	1	1	1	1	1	1	1
female	66		urinary tract infection	diabetes、renal insufficiency	8	1	2	2	0	2	0	0	1	1			1	1	2	1	1	1	1	1	1	1	1	1
female	66				8	1	1	2	0	1	0	0	1	1	86.9		1	1	2	1	1	1	1	0	1	1	1	1
female	66	Respiratory failure	urinary tract infection	diabetes、cerebral infarction、renal insufficiency	Request for discharge	0	2	2	0	2	1	1	1	1		45.56	2	0	2	1	1	0	0	0	0	1	0	1
female	66		pneumonia、liver abscess	diabetes	Request for discharge	0	2	2	0	2	1	1	1	1	228.69	1.82	1	0	2	1	1	0	0	1	1	0	1	1
female	66				Request for discharge	1	2					0	0	0	216	48.91	1	1	2	1	1	0	0	1	1	0	0	1
male	67			malignant tumor	21	0	2	2	0	2	1	1	1	2	3.65					2	2	0	1	1	1	0	1	1
male	67			malignant tumor	12	0	2	2	0	2	1	0	0	2			2	0	2	1	1	0	1	0	0	0	1	1
male	67		pneumonia	cerebral infarction、diabetes、renal insufficiency	5	0	2	2	0	2	1	1	1	1			2	0	2	1	2	1	1	0	0	1	0	1
male	67	0	pneumonia	coronary heart disease、cardiac insufficiency、renal insufficiency、hypertension、diabetes、cerebral infarction	11	1	2	2	0	2	1	1	1	1	134.41	37.27	1	1	2	1	1	0	1	1	0	1	1	1
male	67		pneumonia	cerebral infarction	8	1	2	2	0	2	1	1	1	1			1	0	2	1	1	1	1	1	1	1	1	1
male	67	Coma	pneumonia	cerebral infarction	10	1	2	2	0	2	1	1	1	1			2	0	2	1	1	1	1	1	0	1	1	1
male	67		urinary tract infection、pneumonia	renal insufficiency、coronary heart disease、cerebral infarction	26	1	2	2	0	2	0	1	0	0	164	24.04	1	0	2	1	1	0	0	0	0	0	1	1
male	67	Respiratory failure、skock	pneumonia	Gastrointestinal bleeding、renal insufficiency、hypertension	deaths	CRE	2	2	0	2	0	0	0	0	263.99		2	0	2	1	2	1	1	1	1	0	0	0
male	67			leukaemia、diabetes	Request for discharge	0	0	0	2	0	0	0	0	0	176	22.25				1	1	0	1	0	0	0	2	1
male	67		pneumonia	cardiac insufficiency	Request for discharge	0	0	0	2	0	0	0	0	0	145	0.44	1	0	2	1	1	0	1	0	0	1	0	1
male	67	skock、Respiratory failure	pneumonia		Request for discharge	1	2	2	0	2	1	0	0	1			2	0	2	2	2	0	1	2	1	1	0	2
male	67	skock、Coma、Respiratory failure	pneumonia、urinary tract infection	diabetes、hypertension、cardiac insufficiency	Request for discharge	1	1	2	0	1	1	1	1	0			2	0	2	2	2	0	1	2	1	1	0	1
male	67	Respiratory failure	pneumonia	malignant tumor、renal insufficiency	Request for discharge	CRE	2	2	0	2	0	1	1	1			1	1	2	1	1	0	1	1	0	1	1	1
male	67			leukaemia、diabetes	Request for discharge	CRE	0	0	2	0	0	0	0	0	176	22.25				1	1	0	1	0	1	0	1	1
female	67	Coma	liver abscess	renal insufficiency、diabetes	16	0	1	2	0	1	0	0	0	0			1	1	2	2	1	0	1	0	0	1	1	1
female	67			coronary heart disease、diabetes、cerebral infarction、renal insufficiency	15	0	1	2	0	2	1	1	1	1			1	0	2	1	1	1	1	0	0	1	1	1
female	67	skock、Coma	liver abscess	renal insufficiency	25	0	1	2	0	1	0	1	1	1						2	2	1	0	0	0	0	0	1
female	67		pneumonia	SLE	16	0	2	2	0	2	0	1	1	1			1	1	2	1	1	1	1	1	1	1	1	1
female	67			diabetes	4	0	2	2	0	2	1	1	1	1	125	8.13				1	1	1	1	1	1	1	1	1
female	67	skock	pneumonia	cerebral infarction、renal insufficiency	14	1	2	2	0	2	1	0	0	1	215	0	2	0	2	1	1	0	1	1	1	1	2	1
female	67	skock、Respiratory failure	pneumonia、urinary tract infection	renal insufficiency、cardiac insufficiency、hypertension、diabetes、cerebral infarction	26	1	2	2	0	2	1	0	0	0			2	0	2	2	2	0	1	2	1	0	0	0
female	67		biliary tract infection	renal insufficiency	14	1	2	2	0	2	1	0	0	0	66.37		1	0	2	2	2	0	0	1	1	1	1	1
female	67			renal insufficiency、hypertension、diabetes	Request for discharge	0	1	2	0	2	0	1	1	1		7.1				2	2	0	0	0	0	0	0	0
female	67	Respiratory failure	pneumonia、urinary tract infection	hypertension、diabetes、renal insufficiency	Request for discharge	1	2	2	0	2	0	0	0	1			1	1	2	1	2	0	1	0	0	0	1	1
female	67	skock、Coma、Respiratory failure	urinary tract infection、pneumonia	renal insufficiency、malignant tumor	Request for discharge	CRE	2	2	1	2	1	0	0	1			2	0	2	1	1	0	1	2	1	0	2	1
male	68		urinary tract infection		13	0	2	2	0	2	1	1	1	0		2.16	1	1	2	2	2	0	0	1	1	1	1	1
male	68	skock	pneumonia	malignant tumor、renal insufficiency	59	0	1	2	0	2	0	1	1	1			2	0	2	1	1	0	1	1	1	0	1	0
male	68		liver abscess		17	0	2	2	0	2	1	1	1	2			2	0	2	2	2	0	0	1	0	0	0	1
male	68		pneumonia	hypertension、diabetes、cerebral infarction	13	0	2	2	0	2	1	1	1	1						1	1	0	1	2	1	0	1	1
male	68		biliary tract infection		7	0	1	2	0	2	0	1	1	1	294		1	1	2	2	2	1	1	0	0	1	0	0
male	68		biliary tract infection	hypertension、diabetes、renal insufficiency、cerebral infarction	11	0	2	2	0	2	1	1	1	1			1	1	2	2	2	1	0	0	0	1	0	0
male	68	Coma、Respiratory failure	pneumonia	renal insufficiency、hypertension	19	1	1	2	0	1	0	0	0	0			2	0	2	2	1	0	1	2	2	0	1	2
male	68	Respiratory failure	pneumonia	cardiac insufficiency、renal insufficiency	45	CRE	2	2	0	2	0	0	0	1		5.07	2	0	2	2	2	1	1	0	0	1	1	1
male	68	Respiratory failure		Gastrointestinal bleeding、renal insufficiency、diabetes	deaths	1	0					1	1	0			1	1	2	2	1	0	1	1	1	1	1	1
male	68			pancreatitis、diabetes、hypertension、malignant tumor	deaths	CRE	2	2	0	2	0	0	0	1	6.841	16.41	2	0	2	1	1	1	0	0	1	1	1	1
male	68	skock、Respiratory failure	pneumonia	hypertension、diabetes、Gastrointestinal bleeding、cerebral infarction、cardiac insufficiency	deaths	CRE	1	2	0	2	1	0	0	0		2.2	2	0	2	1	1	1	1	2	1	1	2	1
male	68	Respiratory failure	pneumonia	Gastrointestinal bleeding、renal insufficiency、cardiac insufficiency、bowel obstruction、hypertension	Request for discharge	1	2	0	2	1	0	0	0	0	29.2	3.41	2	0	2	2	2	1	2	0		1	2	1
male	68		biliary tract infection	liver cirrhosis	Request for discharge	1	2	2	0	2	0	1	1	0			2	0	2	1	2	0	1	0	0	0	0	1
female	68			diabetes、cerebral infarction	10	0	1	2	0	1	0	1	1	1			1	1	2	2	2	1	1	1	0	1	0	1
female	68		liver abscess		16	0	1	2	0	1	0	0	0	0			1	0	2	1	2	0	0	1	1	1	0	0
female	68		pneumonia	renal insufficiency、cardiac insufficiency、cerebral infarction、diabetes	4	0	2	2	0	2	1	1	1	1			1	1	2	1	2	0	1	0	0	1	1	1
female	68		liver abscess	diabetes	14	0	2	2	0	2	1	1	1	0	109.89	50	2	0	2	1	1	0	1	1	1	1	1	0
female	68	skock、Respiratory failure	pneumonia、liver abscess	diabetes	38	0	1	2	0	2	0	1	1	0			2	0	2	2	2	0	0	0	0	0	1	1
female	68			cerebral infarction、hypertension、diabetes、renal insufficiency	7	0	1	2	0	2	1	0	0	1			1	1	2	1	1	1	0	0	0	1	0	1
female	68	Respiratory failure、skock	pneumonia、liver abscess		25	0	2	2	0	2	1	1	1	0			1	0	2	2	2	0	0	0	0	1	0	1
female	68		pneumonia	coronary heart disease、cardiac insufficiency、hypertension、diabetes、renal insufficiency、cerebral infarction	27	0	0	2	0	0	0	0	0	1	31.12	50	1	1	2	1	1	0	1	1	0	1	2	1
female	68		pneumonia	cerebral infarction、renal insufficiency、hypertension、diabetes	7	0	1	2	1	1	1	1	1	1	11.81		1	1	2	1	1	1	0	2	2	1	1	1
female	68	0	0		16	1	2	2	0	2	1	1	1	1			1	1	2	2	1	0	1	1	1	1	1	1
female	68		urinary tract infection	diabetes、hypertension	17	1	2	2	0	2	1	1	1	1	254.4	18.17	1	1	2	1	1	0	1	0	0	1	0	1
female	68				12	1	2	2	0	2	1	1	1	1						1	1	1	1	1	1	1	1	1
female	68		urinary tract infection、pneumonia	heart valve disease、cardiac insufficiency、hypertension、renal insufficiency	33	1	2	2	0	2	1	0	0	1	21.21		2	0	2	2	1	1	1	1	1	1	1	1
female	68	skock、Coma、Respiratory failure	urinary tract infection、pneumonia	cerebral infarction、diabetes、renal insufficiency	deaths	1	1	2	0	1	0	0	1	1			1	1	2	1	1	0	0	0	0	1	0	1
female	68			diabetes、renal insufficiency、cerebral infarction	Request for discharge	0	1	2	0	2	0	0	0	0		1.71				1	1	0	1	1	1	0	1	1
female	68			Gastrointestinal bleeding、malignant tumor、liver cirrhosis	Request for discharge	0	1	2	0	2	1	0	0	0			2	0	2	1	2	0	0	2	1	0	0	0
female	68		liver abscess	renal insufficiency	Request for discharge	0	2	2	0	2	1	1	1	1			2	0	2	1	2	0	0	0	0	1	0	0
female	68			leukaemia、diabetes、cerebral infarction	Request for discharge	CRE	0	0	2	0	0	0	0	0			2	0	1	1	1	0	1	1	1	1	1	1
male	69			Gastrointestinal bleeding、cerebral infarction、renal insufficiency	5	0	2	2	0	2	0	2	1	1			2	0	2	2	2	1	0	1	0	1	0	0
male	69		urinary tract infection、pneumonia	cerebral infarction	13	0	2	2	0	2	1	1	1	1			1	0	1	1	1	1	1	1	1	1	1	1
male	69	0		leukaemia	0	1	0	0	2	0	0	0	0	0						1	1	0	1	1	1	0	1	1
male	69		pneumonia、urinary tract infection	renal insufficiency	7	1	2	2	0	2	0	1	1	1	17.92		2	0	2	2	2	0	1	1	1	1	1	1
male	69				22	1	2	2	0	2	0	1	1	1	179					1	1	1	1	1	1	0	0	1
male	69	Respiratory failure	pneumonia、urinary tract infection	renal insufficiency、cardiac insufficiency、diabetes	21	CRE	2	2	0	2	0	1	1	0			1	1	2	1	2	0	1	0	1	1	1	1
male	69		pneumonia		19	CRE	2	2	0	2	1	1	1	1						1	1	1	1	0	0	1	1	1
male	69	skock	pneumonia	bowel obstruction、malignant tumor、renal insufficiency、hypertension	37	CRE	2	2	1	2	0	0	0	1	278.49	5.9	1	0	2	1	2	1	1	0	0	1	2	2
female	69		pneumonia、urinary tract infection	pancreatitis、coronary heart disease、hypertension	11	0	1	2	0	1	1	1	1	1	50.97	2.4	2	0	1	2	2	1	1	1	1	0	1	1
female	69	Coma	pneumonia	renal insufficiency、Gastrointestinal bleeding、hypertension、cerebral infarction	17	0	1	2	0	1	0	0	0	1			1	1	2	1	1	0	1	1	1	0	0	1
female	69		pneumonia	malignant tumor	23	1	2	2	0	2	1	0	0	1	116.84	0.32	2	0	2	1	1	0	1	1	1	0	1	1
female	69	skock	urinary tract infection	renal insufficiency	3	1	2	2	0	2	1	0	0	0	263.62		2	0	2	1	1	0	0	1	1	1	0	0
female	69	skock	urinary tract infection	renal insufficiency	11	1	0	1	1	1	1	1	1	1	177.76		2	0	2	1	2	1	1	1	1	1	1	0
female	69		urinary tract infection	coronary heart disease、hypertension	10	1	1	2	0	1	0	1	1	1	171.34	34.98	1	1	2	1	1	0	1	2	1	1	0	1
female	69	skock	urinary tract infection	cerebral infarction、renal insufficiency	deaths	1	2	2	0	2	0	1	1	0		22.25	2	0	2	2	2	0	1	2	2	0	0	0
female	69	skock、Coma	pneumonia、liver abscess	cerebral infarction、renal insufficiency、hypertension	Request for discharge	0	2	2	0	2	0	1	1	0			1	0	2	2	2	0	0	1	1	0	1	1
female	69		pneumonia	leukaemia	Request for discharge	0	0	1	1	0	0	0	0	0						1	1	1	1	1	1	1	1	1
female	69	skock、Respiratory failure	pneumonia、urinary tract infection	renal insufficiency、cerebral infarction	Request for discharge	1	2	2	0	2	1	0	0	0			1	1	2	1	1	1	2	1	1	1	0	2
female	69		urinary tract infection	renal insufficiency	Request for discharge	1	2	2	0	2	0	0	0	0	282.95	50	2	0	2	2	2	0	1	0	1	1	0	1
male	70		urinary tract infection	malignant tumor、renal insufficiency	16	0	2	2	0	2	1	0	0	1						1	1	0	0	0	0	0	1	0
male	70		liver abscess		29	0	2	2	0	2	1	1	1	2	238.54	3.17	2	0	2	2	2	0	1	1	0	1	1	1
male	70		biliary tract infection	renal insufficiency	6	0	2	2	0	2	0	1	1	1			2	0	2	2	2	1	1	0	0	1	1	1
male	70		pneumonia、liver abscess	cerebral infarction、renal insufficiency	16	0	1	2	0	1	0	1	1	0			2	0	2	2	2	1	0	0	0	1	0	1
male	70		urinary tract infection	renal insufficiency	14	0	2	2	0	2	1	1	1	1	447	24	1	0	2	1	1	0	0	0	0	1	1	1
male	70		pneumonia	heart valve disease、cardiac insufficiency、cerebral infarction、renal insufficiency	23	1	1	2	0	2	0	0	0	1						2	1	1	1	2	1	1	1	1
male	70			hypertension	deaths	0	2	2	0	2	1	0	0	1	210.38	1.18	2	0	2	1	2	0	1	1	0	1	1	1
female	70		urinary tract infection	coronary heart disease、hypertension、diabetes	10	0	2	2	0	2	0	0	0	1	138.66	1.98	1	0	2	1	1	0	1	0	0	1	1	1
female	70		urinary tract infection	cardiac insufficiency、diabetes	7	0	2		0	2	0	1	2	1	109.94	6.88	1	1	2	1	1	1	0	2	1	1	1	1
female	70		pneumonia	heart valve disease、cardiac insufficiency、hypertension	46	1	1	2	0	2	1	0	0	1			1	0	2	1	1	0	1	2	2	0	1	1
female	70		urinary tract infection	coronary heart disease、cardiac insufficiency、renal insufficiency	11	1	2	2	0	2	0	0	0	1			1	1	2	1	1	1	1	0	0	0	2	1
female	70		urinary tract infection、pneumonia	renal insufficiency	23	1	2	2	0	2	0	0	0	1						1	1	0	1	1	1	0	0	1
female	70			malignant tumor、coronary heart disease、diabetes、renal insufficiency	9	1	1	2	0	2	0	0	0	0	58.53	5	2	0	2	1	1	0	0	1	1	0	1	0
female	70		urinary tract infection	cerebral infarction、Gastrointestinal bleeding、renal insufficiency	9	1	2	2	0	2	1	0	0	2			1	0	1	1	1	0	1	0	0	0	1	1
male	71		pneumonia、biliary tract infection	hypertension、cerebral infarction、coronary heart disease、renal insufficiency	8	0	2	2	0	2	1	1	1	1	237.29	12.59	2	0	2	1	2	1	1	1	1	1	0	0
male	71		biliary tract infection		8	0	2	2	0	2	1	1	1	1			2	0	2	2	2	1	1	1	1	0	0	1
male	71		pneumonia、biliary tract infection	renal insufficiency、malignant tumor	8	0	2	2	0	2	1	0	0	0	67.9	50				2	1	0	0	1	1	0	1	1
male	71		urinary tract infection、pneumonia	coronary heart disease、renal insufficiency	0	1	2	2	0	2	0	1	1	1	115.29	50	1	1	2	1	2	0	1	0	0	0	1	1
male	71		pneumonia	cerebral infarction	5	1	2	2	0	2	1	0	1	1			2	0	2	2	2	0	0	0	0	0	1	1
male	71			cardiac insufficiency、coronary heart disease、hypertension、renal insufficiency、Gastrointestinal bleeding	5	1	2	2	0	2	0	0	0	1			1	1	2	1	1	0	1	1	1	0	2	1
male	71		urinary tract infection	malignant tumor、hypertension、diabetes	14	1	1	1	1	1	1	0	0	1	7.87		1	0	2	1	1	0	0	1	0	0	0	1
male	71		pneumonia	leukaemia、renal insufficiency、diabetes	deaths	1	0	0	2	0	0	0	0	0	215	5.61				1	1	0	1	0	0	1	2	1
male	71			liver cirrhosis、malignant tumor	Request for discharge	0	1	2	0	1	1	0	0	0			2	0	2	1	1	0	1	1	2	0	1	1
male	71	Respiratory failure	pneumonia、biliary tract infection	pancreatitis	Request for discharge	1	1	1	1	1	1	1	1	1			1	0	2	1	1	0	1	1	1	1	0	1
female	71		urinary tract infection	renal insufficiency	15	0	2	0	0	0	1	1	1	0		50	1	1		1	1	0	1	2	0	1	1	1
female	71		pneumonia、urinary tract infection	coronary heart disease、hypertension、diabetes	13	0	2	2	0	2	0	1	1	1	254.24	44.4	1	1	1	2	2	1	0	1	1	1	1	1
female	71		pneumonia	bowel obstruction、cerebral infarction、Gastrointestinal bleeding	4	0	1	1	1	1	1	0	0	1		0.18	1	1	2	1	1	1	0	0	1	1	0	1
female	71		urinary tract infection	renal insufficiency	9	1	2	2	0	2	1	0	0	2			1	1	2	1	1	0	1	1	1	1	1	1
female	71				12	1	2	2	0	2	1	1	1	1			1	1	1	1	1	1	1	1	1	1	1	1
female	71	Respiratory failure	urinary tract infection	renal insufficiency	9	1	1	2	0	1	0	1	1	1	196	30.6	2	0	2	1	1	0	0	1	1	0	1	0
female	71	Respiratory failure	pneumonia	diabetes	10	1	2	2	0	2	0	1	1	0	200	4.12	1	0	2	2	1	0	0	0	1	1	1	0
female	71		urinary tract infection	diabetes、malignant tumor	41	CRE	1	2	0	1	1	0	0	1			1	1	2	1	1	1	1	0	0	1	1	1
female	71		urinary tract infection、pneumonia	Gastrointestinal bleeding、cerebral infarction、renal insufficiency、malignant tumor	14	1	1	2	0	2	0	0	0	1			1	0	2	1	1	1	1	0	0	0	1	1
female	71	Coma	urinary tract infection	diabetes、cerebral infarction、renal insufficiency	Request for discharge	0	1	2	0	2	1	1	1	0		50	2	0	2	1	2	0	1	0	1	1	1	1
female	71	Respiratory failure	pneumonia	cerebral infarction、hypertension	Request for discharge	0	1	2	0	1	1	1	1	1		50	2	0	2	1	1	0	0	0	0	1	0	1
female	71	skock	urinary tract infection、pneumonia	renal insufficiency、cerebral infarction	Request for discharge	0	2	2	1	2	2	1	1	0		50	2	0	2	1	2	1	0	1	1	1	1	0
female	71		urinary tract infection	renal insufficiency	Request for discharge	1	1	2	0	1	1	1	1	0	94.2		1	1	2	1	1	0	1	0	1	1	1	1
male	72		urinary tract infection、pneumonia	cerebral infarction、diabetes、renal insufficiency	12	0	1	2	0	1	1	0	0	1			2	0	2	1	1	0	1	0	0	1	1	1
male	72		biliary tract infection	malignant tumor	4	0	1	2	0	2	1	1	1	1			2	0	2	2	2	0	0	0	0	2	1	1
male	72			bowel obstruction、coronary heart disease、cerebral infarction	69	0	1	2	0	1	0	1	1	1			1	1	2	1	1	1	1	0	0	0	1	1
male	72		liver abscess	diabetes、renal insufficiency	5	0	1	2	0	1	0	1	1	1			2	0	2	1	1	1	1	0	0	1	1	1
male	72		pneumonia		16	0	1	2	0	2	0	1	1	0		50	2	0	2	2	2	1	1	1	0	1	0	0
male	72		pneumonia	cerebral infarction、hypertension、diabetes	13	0	2	2	0	2	1	0	1	1						1	1	0	1	0	1	0	1	1
male	72				13	0	1	2	0	2	0	2	1	1			1	1	2	2	2	1	1	0	0	1	1	1
male	72		biliary tract infection	coronary heart disease	22	0	2	2	0	2	1	1	1	2			1	1	2	2	2	1	0	0	0	1	1	1
male	72		urinary tract infection、pneumonia	diabetes、cerebral infarction	6	1	2	2	0	2	1	1	1	1						1	1	1	1	1	0	1	1	1
male	72	skock、Respiratory failure	pneumonia	renal insufficiency	deaths	0	2	2	0	2	1	2	1	1			2	0	2	1	2	0	1	2	0	1	2	2
male	72	Coma		leukaemia、diabetes	deaths	1	0	0	2	0	0	0	0	0						1	1	0	1	0	0	1	1	1
male	72	skock、Respiratory failure、Coma	pneumonia	Gastrointestinal bleeding、hypertension、renal insufficiency、coronary heart disease	Request for discharge	0	2	2	0	2	1	0	0	2			1	0	2	1	1	1	2	1	0	1	2	2
female	72	skock	biliary tract infection	renal insufficiency	13	0	2	2	0	2	1	0	0	0	221.35	50	2	0	2	1	2	0	1	1	1	0	1	0
female	72			cerebral infarction、diabetes、renal insufficiency	6	0	2	2	0	2	1	0	1	1			1	1	1	1	1	0	0	0	0	1	0	1
female	72		urinary tract infection	cerebral infarction、diabetes	12	0	2	2	0	2	1	1	1	1			1	1	1	2	2	1	1	1	1	1	1	1
female	72		urinary tract infection	cerebral infarction、hypertension、diabetes	14	0	1	2	0	1	1	1	1	1		3.29	1	1	1	1	1	1	1	1	1	1	1	1
female	72	Coma	urinary tract infection	diabetes、renal insufficiency	13	0	2	2	0	2	1	0	0	0			1	0	2	1	2	0	1	1	1	0	0	1
female	72	Respiratory failure	urinary tract infection	hypertension、diabetes、renal insufficiency	6	0	2	2	0	2	0	1	1	1			1	0	2	1	1	0	0	0	0	1	1	1
female	72	skock	urinary tract infection	hypertension、diabetes、renal insufficiency	8	0	2	2	0	2	1	1	1	1	232.63	50	1	1	2	2	2	1	1	1	1	1	1	0
female	72				14	1	2	2	0	2	0	1	1	1	242.13		2		2	1	1	0	0	0	1	0	0	1
female	72		urinary tract infection	renal insufficiency	20	1	2	2	0	2	0	1	1	1	40.7	50				1	1	0	0	1	1	0	1	1
female	72			malignant tumor	17	1	1	2	0	2	0	0	0	0	80					2	2	0	1	1	0	1	1	1
female	72		urinary tract infection	coronary heart disease、hypertension	20	1	2	2	0	2	1	1	1	1			1	1	2	1	1	1	1	1	1	1	1	1
female	72		liver abscess	hypertension、diabetes、renal insufficiency	Request for discharge	0	2	2	0	2	1	1	1	1			2	0	2	2	2	0	1	0	0	1	1	0
female	72		pneumonia	coronary heart disease、hypertension、cardiac insufficiency、renal insufficiency、cerebral infarction、diabetes	Request for discharge	1	2	2	0	2	0	1	1	1			2	0	2	1	1	1	0	2	1	1	0	0
female	72			malignant tumor、renal insufficiency、diabetes	Request for discharge	1	2	2	0	2	1	0	0	1			2	0	2	2	1	0	1	0	0	1	1	1
female	72		urinary tract infection、pneumonia	cerebral infarction、bowel obstruction、renal insufficiency	Request for discharge	1	2	2	0	2	1	0	0	1			2	0	2	1	1	0	0	1	0	1	1	0
male	73		pneumonia	bowel obstruction	19	0	1	2	0	1	1	1	1	2	179	0.29	2	0	2	1	1	1	1	1	1	0	0	1
male	73			malignant tumor、renal insufficiency	8	0	2	2	0	2	0	1	1	1	92.55	2.381	2	0	2	2	2	1	0	1	1	1	0	1
male	73	Respiratory failure	pneumonia	hypertension	27	1	2	2	0	2	1	0	0	1	72.13		2	0	2	1	1	0	1	2	1	1	0	1
male	73		biliary tract infection	renal insufficiency	6	1	2	2	0	2	0	1	1	1			1	1	2	2	2	1	1	1	1	1	1	1
male	73				17	CRE	0	2	0	1	0	0	0	1	23.5	50				1	1	1	1	1	1	1	1	0
female	73		pneumonia、liver abscess	hypertension、diabetes、renal insufficiency、cardiac insufficiency、cerebral infarction	5	0	2	2	0	2	0	1	1	1			1	1	2	2	2	1	1	0	0	1	1	1
female	73		pneumonia	hypertension、diabetes、renal insufficiency	6	1	1	2	1	2	1	1	1	1	13.8	3.07	1	0	2	1	1	1	0	1	1	1	2	1
male	74		urinary tract infection	hypertension、diabetes、renal insufficiency	10	0	0	2	0	1	0	1	1	0			1	1	2	1	1	0	1	0	0	1	0	0
male	74	skock、Coma、Respiratory failure	pneumonia	renal insufficiency	120	CRE	2	2	0	2	1	0	0	0		4.35	2	0	2	1	1	1	1	0	0	1	0	1
male	74	skock、Respiratory failure	biliary tract infection、pneumonia	cerebral infarction、renal insufficiency	deaths	1	2	2	0	2	1	0	0	0			2	0	2	2	2	0	1	1	1	0	2	1
male	74	skock、Respiratory failure	biliary tract infection	renal insufficiency	Request for discharge	1	2	2	0	2	1	1	1	0			2	0	2	2	2	0	1	1	0	1	1	0
female	74			coronary heart disease、diabetes、cardiac insufficiency	10	0	2	2	0	2	1	0	1	1			1	1	2	1	1	0	1	0	0	0	1	0
female	74		pneumonia	cerebral infarction、hypertension、diabetes、cardiac insufficiency、coronary heart disease	11	0	2	2	0	2	0	1	1	1			1	1	2	1	1	1	1	0	0	2	1	1
female	74			coronary heart disease、cardiac insufficiency、renal insufficiency	9	1	2	2	0	2	0	1	1	0			1	1	2	1	1	0	1	1	0	1	1	1
female	74		urinary tract infection、pneumonia	hypertension、diabetes、cerebral infarction、coronary heart disease	15	1	2	2	0	2	1	1	1	1	101	50	1	1	1	1	1	1	0	1	0	1	1	0
male	75	skock、Respiratory failure	pneumonia	hypertension、diabetes、cerebral infarction、renal insufficiency	23	0	2	2	0	2	1	1	1	1			1	0	1	2	2	1	1	0	0	1	1	1
male	75			malignant tumor、liver cirrhosis	12	0	1	2	0	1	0	0	0	1			2	0	2	2	2	0	1	0	0	1	0	1
male	75			renal insufficiency	9	1	2	2	0	2	1	1	1	1	177.5		1	0	2	2	2	1	1	0	0	1	1	1
male	75		liver abscess	cerebral infarction、renal insufficiency	Request for discharge	0	2	2	0	2	1	1	1	1			1	0	2	2	2	1	1	0	0	1	0	0
female	75		urinary tract infection	cerebral infarction、hypertension、renal insufficiency	7	0	2	2	0	2	1	1	0	1			1	0	2	1	2	1	0	1	1	1	1	1
female	75		urinary tract infection、pneumonia	diabetes、hypertension	13	0	2	2	0	2	1	1	1	1	123	0.15	1	0	2	2	2	0	0	0	0	1	0	1
female	75		urinary tract infection、pneumonia	hypertension、cerebral infarction	15	0	2	2	0	2	1	1	1	1	174	28.92	1	0	2	1	1	1	0	1	1	1	0	1
female	75		pneumonia	cerebral infarction、hypertension、diabetes	39	0	2	2	0	2	1	1	1	1						1	1	0	0	0	1	1	0	1
female	75			hypertension	7	0	2	2	0	2	1	1	1	1						1	1	1	1	1	1	1	1	1
female	75			cerebral infarction、hypertension、diabetes、renal insufficiency	6	0	2	2	0	2	0	1	1	0			1	1	2	1	2	1	0	0	0	1	1	1
female	75		urinary tract infection	cerebral infarction	6	1	1	2	0	1	1	1	1	1			1	0	2	1	1	1	1	1		1	1	0
female	75		pneumonia	renal insufficiency	16	1	2	2	0	2	1	1	1	1	153	5.74	2	0	2	1	1	1	1	1	1	1	0	1
female	75		urinary tract infection	renal insufficiency	7	1	1	2	0	1	1	0	0	2			1	0	1	2	2	1	0	0	0	1	1	1
female	75	skock	biliary tract infection	hypertension、renal insufficiency	Request for discharge	1	2	2	0	2	0	0	0	1	292.1		1	2	2	2	2	0	0	2	1	1	1	1
female	75	Respiratory failure	pneumonia	renal insufficiency、cerebral infarction	Request for discharge	CRE	2	2	0	2	1	0	0	1	260.63	50	2	0	2	1	2	0	0	1	0	1	1	0
male	76	Coma	pneumonia	leukaemia、hypertension、diabetes	deaths	1	0	0	2	0	0	0	0	0		1.15	2	0	2	1	1	0	1	0	0	0	1	1
male	76	skock		cerebral infarction、renal insufficiency	Request for discharge	0	2	2	0	2	0	1	1	1			2	0	2	1	1	0	1	0	0	1	2	1
male	76		biliary tract infection	cardiac insufficiency、renal insufficiency	Request for discharge	1	2	2	0	2	1	0	0	1	23.86		2	0	2	1	1	1	1	2	2	1	2	2
female	76				5	0	2		0	2	1	1	1	1			1	0	2	2	2	1	1	1	1	1	0	0
female	76			cerebral infarction、coronary heart disease、renal insufficiency	7	0	1	2	0	1	0	1	1	1			1	1	2	2	2	1	0	1	0	1	0	1
female	76		liver abscess	cerebral infarction、hypertension	8	0	2	2	0	2	1	0	0	1			2	0	2	2	2	0	0	1	1	0	0	1
female	76		urinary tract infection	hypertension、cerebral infarction	8	0	2	2	0	2	1	1	1	1			1	1	2	2	1	1	0	1	1	1	0	1
female	76		urinary tract infection		12	1	2	2	0	2	0	1	1	1			1	1	1	1	1	1	0	1	1	0	1	1
female	76	skock、Coma	pneumonia、liver abscess	renal insufficiency	Request for discharge	0	2	2	0	2	0	1	1	0		50	1	1	2	2	2	1	1	1	1	1	0	2
male	77		pneumonia	cerebral infarction	8	1	1	2	0	2	0	1	1	1	187	8.65	1	1	2	2	2	1	1	1	0	1	1	0
male	77	Coma、skock、Respiratory failure	urinary tract infection	diabetes、renal insufficiency	10	1	2	2	0	2	0	1	1	0	178.8	11.88	2	0	2	1	1	0	1	0	0	2	0	0
male	77		pneumonia、liver abscess	cerebral infarction、diabetes、renal insufficiency	13	1	1	2	0	2	0	0	0	1	176.63	1.76	2	0	2	1	2	0	1	0	0	1	1	1
male	77			renal insufficiency、coronary heart disease、cerebral infarction	26	1	1	2	0	1	1	0	0	0					1	1	1	1	1	1	1	1	1	1
female	77	skock、Respiratory failure	liver abscess、pneumonia	renal insufficiency、hypertension、diabetes	23	0	1	2	0	2	0	1	1	0			2	0	2	2	2	0	0	1	1	0	0	1
female	77		urinary tract infection	leukaemia	23	1	2	0	0	0	0	0	0	0	24.1	0.47	1	0	2	1	2	1	1	1	1	1	1	1
female	77				11	1	2	2	0	2	1	1	1	1						1	2	0	0	1	1	1	0	1
female	77		pneumonia、urinary tract infection	leukaemia、coronary heart disease、Gastrointestinal bleeding	deaths	0	2	2	2	0	2	0	0	0	188	1.63	2	0	2	1	2	1	1	1	1	1	1	1
female	77		pneumonia、liver abscess		Request for discharge	0	1	2	0	2	0	1	1	1	127.55	3.63	1	0	2	2	2	0	0	1	1	0	1	1
female	77	Coma	pneumonia、intestinal infection	cerebral infarction、hypertension、renal insufficiency	Request for discharge	0	1	2	0	1	0	1	1	1		32.37	1	1	2	1	2	1	0	1	1	1	0	0
female	77	Coma	pneumonia、urinary tract infection	diabetes、renal insufficiency、hypertension、cerebral infarction	Request for discharge	1	2	2	0	2	1	1	1	1			1	0	2	1	1	1	1	2	2	0	2	1
male	78		pneumonia、urinary tract infection	renal insufficiency、cardiac insufficiency	8	0	2	2	0	2	0	2	2	1	299	29	1	1	1	1	1	1	1	0	0	1	2	1
male	78		pneumonia	diabetes、renal insufficiency	13	0	2	2	0	2	1	1	1	0		50	2	0	2	2	2	0	1	1	1	1	1	1
male	78			coronary heart disease	40	0	1	2	0	2	1	1	1	1			2	0	1	2	2	1	1	1	1	1	1	1
male	78		urinary tract infection	cerebral infarction	6	1	2	2	0	2	1	1	1	1	124	0.82	1	0	1	1	1	1	1	0	0	1	1	1
male	78		biliary tract infection、urinary tract infection		7	1	1	2	0	2	0	1	1	1			1	0	2	2	2	0	1	1	1	1	0	1
female	78			coronary heart disease、hypertension、Gastrointestinal bleeding、malignant tumor	28	0	1	2	0	2	1	0	0	1			1	1	1	2	2	1	0	0	1	0	0	1
female	78		pneumonia、liver abscess	hypertension	24	0	2	2	0	2	1	0	0	1						1	1	0	0	0	1	1	0	0
female	78			diabetes、renal insufficiency	10	1	2	2	0	2	0	0	1	1			1	1	2	1	1	0	1	0	1	1	0	0
female	78		urinary tract infection	renal insufficiency	33	1	2	2	0	2	1	1	1	1						1	1	1	0	1	0	1	1	1
female	78		urinary tract infection、pneumonia	coronary heart disease、cerebral infarction	22	1	2	2	0	2	1	0	1	2	151	6.39	2	0	2	1	1	1	1	0	0	1	1	1
female	78			cerebral infarction、renal insufficiency	12	1	1	2	0	1	1	1	1	1	172	50	1	1	2	1	1	1	1	1	0	1	1	1
female	78	skock	pneumonia、urinary tract infection	hypertension、cerebral infarction、renal insufficiency	deaths	0	2	2	0	2	0	0	1	1			2	0	2	1	2	0	0	0	0	0	0	0
female	78	Respiratory failure	pneumonia、liver abscess	cerebral infarction、cardiac insufficiency、diabetes、renal insufficiency	Request for discharge	0	2	2	0	2	1	0	0	1		26.56	1	1	2	1	2	1	1	0	0	1	0	1
male	79		pneumonia	cerebral infarction、hypertension、diabetes	18	0	2	2	0	2	1	1	1	1			1	1	2	1	2	0	1	0	0	1	1	1
male	79	skock、Coma	urinary tract infection	renal insufficiency	Request for discharge	1	2	2	0	2	0	1	1	0		50	2	0	2	2	2	0	0	1	0	0	1	1
female	79	Coma	pneumonia	renal insufficiency	15	0	2	0	0	0	1	0	1	0	345.35	50	2	0	2	1	1	0	1	0	0	1	1	1
female	79		urinary tract infection、pneumonia	malignant tumor	7	0	2	2	0	2	1	1	1	1	130	17.95	1	1	2	1	1	1	0	1	1	1	1	1
female	79		urinary tract infection	liver cirrhosis、malignant tumor	9	0	1	2	0	1	0	0	1	0						2	2	0	0	0	1	1	0	1
female	79		pneumonia、urinary tract infection		41	1	2	2	0	2	1	1	1	1	34.54					1	1	0	1	1	1	1	0	0
female	79		urinary tract infection		30	1	2	2	0	2	0	1	1	1		4.64	1	1	2	1	1	1	1	1	1	1	2	1
male	80		urinary tract infection、pneumonia	diabetes、coronary heart disease、renal insufficiency、cerebral infarction	16	1	2	2	0	2	1	1	1	1			1	0	2	1	1	0	1	0	0	1	1	1
male	80		urinary tract infection	coronary heart disease、hypertension	21	1	2	2	0	2	1	0	0	1	167.16					1	1	0	1	1	1	1	1	1
male	80		urinary tract infection		17	1	2	2	0	2	1	1	1	1			1	1	2	1	1	0	1	1	1	1	0	1
male	80	skock	biliary tract infection		Request for discharge	0	1	2	0	1	1	0	1	1			1	0	2	1	1	1	1	1	1	1	1	2
male	80	Respiratory failure、Coma	pneumonia	renal insufficiency、malignant tumor	Request for discharge	0	2	2	0	2	1	1	1	1		8.49	2	0	2	1	1	0	0	1	0	1	2	1
female	80	Respiratory failure	urinary tract infection	hypertension、coronary heart disease、cardiac insufficiency、renal insufficiency	11	0	2	2	0	2	1	2	1	1	219.97	30.4	1	0	2	2	2	0	1	0	0	1	1	1
male	81		pneumonia、liver abscess	renal insufficiency、cerebral infarction、coronary heart disease	13	0	1	2	0	2	0	1	1	1			2	0	2	2	2	0	0	1	0	1	0	1
male	81		biliary tract infection		9	0	1	2	0	1	0	1	1	1			1	1	2	2	2	1	0	0	0	1	0	1
male	81	Respiratory failure	urinary tract infection、pneumonia	cardiac insufficiency、diabetes、cerebral infarction、renal insufficiency	15	0	2	2	0	2	1	1	1	1	190.53	50	2	0	2	1	1	1	0	1	1	1	1	1
male	81		pneumonia	coronary heart disease	21	1	2	1	1	1	1	0	1	0		7.95	1	1	2	1	2	0	0	1	1	0	1	0
male	81		urinary tract infection	cerebral infarction、renal insufficiency	7	1	2	2	0	2	1	1	1	1			2	0	2	1	1	1	0	0	0	1	1	1
male	81		perianal infection	renal insufficiency、Gastrointestinal bleeding	Request for discharge	1	0	0	2	0	0	0	0	0	250	3.43	2	0	2	1	1	0	2	1	0	1	1	1
female	81		pneumonia、urinary tract infection	diabetes、renal insufficiency	22	0	1	2	0	1	0	0	0	1	181	9.91	1	1	2	1	1	0	1	2	1	1	2	2
female	81		urinary tract infection	diabetes、renal insufficiency	8	0	2	2	0	2	1	1	1	1			2	0	1	1	1	1	0	1	0	1	0	1
female	81	skock	urinary tract infection、pneumonia	Gastrointestinal bleeding、renal insufficiency	12	0	2	2	0	2	1	1	1	0	30.55		2	0	2	2	2	0	0	0	1	0	0	0
female	81		urinary tract infection	cardiac insufficiency、hypertension、renal insufficiency	24	1	1	2	0	2	1	0	0	0	61.54		2	0	2	1	2	1	1	2	2	1	1	2
female	81	skock、Respiratory failure	pneumonia	cerebral infarction、renal insufficiency、hypertension、coronary heart disease	Request for discharge	1	2	0	2	2	2	1	1	1			2	0	2	1	1	1	0	2	2	1	0	2
male	82			cerebral infarction	15	0	2	2	0	2	0	1	1	1			1	2	2	1	1	1	1	0	0	1	0	1
male	82		pneumonia		8	0	1	1	1	1	1	1	1	1			1	1	1	1	2	1	0	1	1	1	1	1
male	82	Respiratory failure、skock		renal insufficiency	Request for discharge	0	2	2	0	2	1	1	1	0	243.7		2	0	2	1	2	0	1	1	1	1	2	1
female	82		urinary tract infection、pneumonia		17	0	2	2	0	2	1	1	1	1			1	1	2	1	1	1	1	1	1	1	1	1
female	82		urinary tract infection	cerebral infarction、hypertension、pancreatitis	9	0	2	2	0	2	1	1	1	1			1	1	2	2	2	1	0	0	0	1	1	1
male	83		pneumonia、liver abscess		26	0	1	2	0	1	1	1	1	0	228.22	5.89	2	0	2	1	2	1	1	1	1	1	0	1
male	83		urinary tract infection、pneumonia	malignant tumor	24	1	1	2	0	1	0	1	1	1	16.3	0.13				1	1	1	1	1	0	1	1	1
female	83			cerebral infarction、renal insufficiency、coronary heart disease、hypertension	21	0	2	2	0	2	0	1	1	1		28.29	1	1	2	1	2	0	1	1	1	1	0	0
female	83		urinary tract infection	coronary heart disease	14	0	2	2	0	2	1	1	1	0	15.21	30.57	2	0	2	1	1	1	0	1	1	1	0	1
female	83		urinary tract infection、pneumonia	renal insufficiency、cardiac insufficiency、cerebral infarction	16	0	2	2	0	2	0	0	1	0	122.72	7.04	2	0	2	1	1	0	0	1	1	1	1	1
female	83		biliary tract infection		13	1	1	2	0	1	1	1	1	2			2	0	2	2	2	1	1	1	1	1	1	1
female	83	skock、Respiratory failure	urinary tract infection、pneumonia	diabetes、renal insufficiency	Request for discharge	1	2	2	0	2	1	1	1	1		29.59	1	0	2	1	2	0	1	1	1	1	0	1
male	84		urinary tract infection	hypertension、renal insufficiency	25	0	2	2	0	2	1	1	1	1			1	1	2	1	1	1	1	1	1	0	0	1
male	84	skock、Coma	pneumonia	hypertension、diabetes、cerebral infarction、coronary heart disease、	23	1	2	2	0	2	0	1	1	1	77.43	7.63	2	0	2	2	2	1	0	1	1	1	1	1
female	84		urinary tract infection	cerebral infarction、hypertension、diabetes	15	0	2	2	0	2	1	0	0	2			2	0	2	1	1	0	0	0	0	0	0	1
female	84		pneumonia	cardiac insufficiency、renal insufficiency、Gastrointestinal bleeding	16	1	2	2	0	2	1	0	0	1	88.69	50	2	0	2	1	2	0	1	1	1	0	1	1
female	84	Respiratory failure	pneumonia	Gastrointestinal bleeding、renal insufficiency、hypertension、diabetes、cerebral infarction	15	1	2	2	0	2	0	0	1	1	113	35.38	1	0	2	1	1	0	0	0	0	1	0	1
female	84	skock	pneumonia	Gastrointestinal bleeding、hypertension、diabetes、coronary heart disease、cardiac insufficiency	Request for discharge	0	2	2	0	2	0	1	1	1			2	0	2	2	2	1	0	1	1	0	0	0
female	84	skock	urinary tract infection、pneumonia	bowel obstruction、cardiac insufficiency、renal insufficiency	Request for discharge	1	2	2	0	2	1	1	1	1			2	0	2	1	1	1	1	1	0	1	1	0
male	85			cerebral infarction	8	0	1	2	1	1	1	1	1	1			1	1	2	2	2	1	1	0	0	1	1	1
male	85			coronary heart disease、hypertension	15	0	1	2	0	1	1	1	1	1			1	1	1	1	1	1	1	1	1	1	1	1
male	85				7	1	1	2	1	1	1	1	1	1			1	1	2	2	2	1	1	0	0	1	1	1
female	85		urinary tract infection、pneumonia	coronary heart disease、hypertension、renal insufficiency	16	0	2	2	0	2	1	1	1	1			1	1	2	1	1	1	1	0	1	1	1	1
female	85		urinary tract infection、pneumonia		14	1	2	2	0	2	1	0	0	1	109	50	1	1	2	1	1	0	1	0	1	0	1	1
male	86		urinary tract infection	cerebral infarction、diabetes	7	0	1	1	1	1	1	1	1	1			1	1	2	1	1	1	1	1	1	1	0	1
male	86	skock	biliary tract infection	renal insufficiency	23	1	2	2	0	2	1	1	1	0	107		2	0	2	2	2	1	0	2		1	0	1
female	86		liver abscess、pneumonia		5	0	2	2	0	2	1	1	1	1	175.34	38.52	2	0	2	2	2	0	0	1	0	0	1	1
male	87		biliary tract infection	Gastrointestinal bleeding、malignant tumor、renal insufficiency	Request for discharge	1	1	2	0	1	1	0	0	1			2	0	2	1	1	0	1	0	0	0	1	1
female	87	skock、Respiratory failure	pneumonia	coronary heart disease、cardiac insufficiency、hypertension、diabetes、renal insufficiency	死	1	2	2	0	2	1	0	0	0	245.5	2.87	1	0	2	1	2	0	1	1	1	0	0	1
female	87		urinary tract infection、pneumonia	coronary heart disease、cardiac insufficiency、renal insufficiency、hypertension、Gastrointestinal bleeding	Request for discharge	0	1	2	0	1	1	0	0	1		50	1	1	2	1	1	0	1	1	1	0	2	1
male	88		urinary tract infection、biliary tract infection	cardiac insufficiency、coronary heart disease、hypertension、diabetes、renal insufficiency	15	1	2	2	0	2	0	1	1	0			1	1	2	1	1	1	1	0	0	1	1	1
male	88	Respiratory failure	pneumonia、urinary tract infection	cerebral infarction、hypertension、diabetes、Gastrointestinal bleeding、renal insufficiency	9	1	2	2	0	2	0	1	1	0		50	1	1	2	1	1	0	1	2	1	0	1	1
male	88	skock、Coma	pneumonia、urinary tract infection	cerebral infarction、renal insufficiency	Request for discharge	0	2	2	0	2	0	1	1	0			2	0	2	1	2	0	0	1	1	0	0	1
female	88	skock		cardiac insufficiency、renal insufficiency	17	1	2	2	0	2	1	1	1	0	154	41.54	1	0	2	2	2	0	1	1	1	0	0	1
male	89	Coma、skock	pneumonia、urinary tract infection	renal insufficiency、hypertension、Gastrointestinal bleeding	deaths	CRE	2	2	0	2	1	0	0	1	37.49					2	1	1	2	0	0	1	2	2
female	89		pneumonia、liver abscess	renal insufficiency、cerebral infarction	15	0	2	2	0	2	1	1	1	1	104.41	50	1	0	2	2	2	1	0	0	1	0	1	1
female	90	Coma	pneumonia	diabetes、cerebral infarction、renal insufficiency	deaths	CRE	2	2	0	2	1	0	0	1			1	1	2	1	2	0	1	1	0	1	1	1
female	90	Coma、skock、Respiratory failure	pneumonia	diabetes、cerebral infarction、renal insufficiency	deaths	CRE	2	2	0	2	1	0	0	1			1	1	2	1	2	0	1	1	0	1	1	1
female	90			coronary heart disease、renal insufficiency	Request for discharge	1	2	2	0	2	0	1	1	1			1	1	2	1	2	1	0	1	1	1	0	0
male	91		urinary tract infection、pneumonia	cerebral infarction、renal insufficiency	9	0	2	2	0	2	1	1	1	1	172	2.16	1	1	2	1	1	1	0	2	0	1	1	1
male	91		pneumonia	cerebral infarction、renal insufficiency	15	1	0	1	1	1	1	0	0	1	24.49	14.47	1	1	2	2	2	1	1	1	1	1	1	1
female	93		pneumonia	malignant tumor	13	1	1	2	0	1	1	1	1	1	60.66	15.41	2	0	2	1	1	1	1	1	1	1	1	1
male	95		pneumonia	diabetes、hypertension	48	0	1	2	0	1	1	1	1	1	39.9	0.18	1	1	2	1	1	1	1	1	0	1	1	1
male	95	skock	pneumonia	cerebral infarction、cardiac insufficiency	33	1	2	2	0	2	1	1	1	1	57.91	0.59	1	1	2	1	1	0	1	1	0	0	1	1
